# Supplementary material
Source: PubMed Central journal article supplement (PMC4807517)
Supplement: AEM.03678-15_zam999117034so1.pdf [file AEM.03678-15_zam999117034so1.pdf]

## Ecological Genomics of the Uncultivated Marine Roseobacter Lineage CHAB-I-5

Yao Zhang, Ying Sun, Nianzhi Jiao, Ramunas Stepanauskas, Haiwei Luo

### Supplemental Results

#### *Organic carbon uptake and catabolism*

The CHAB-I-5 and DC5-80-3 lineages are likely to be more versatile in the uptake of various carbohydrate compounds compared to the other two uncultivated lineages SAG-O19 and NAC11-7, and most of the six cultured pelagic strains (Table 4). The alpha-glucoside transport system (*aglEFGK*), the rhamnose transport system (*rhaPSQT*), the fructose transport system (*frcABC*), the ribose transport system (*rbsABC*), the sorbitol/mannitol transport system (*smoEFG*), and the D-xylose transport system (*xylFGH*), for instance, are consistently present in the CHAB-I-5 and DC5-80-3 lineages and differentially present in the SAG-O19 and NAC11-7 lineages, but are completely or largely missing in the cultured pelagic strains Y4I, DSS-3, HTCC2597, and GAI101. Most of these carbohydrates are taken up by the type strain *Planktomarina temperate* RCA23 of the DC5-80-3 lineage (1), and most of these transporters are functional in *Phaeobacter gallaeciensis* BS107 (2), a scallop-associated strain (3) closely related to *Phaeobacter* sp Y4I analyzed here. These mechanisms are therefore likely to be important for the ecological success of lineages CHAB-I-5 and DC5-80-3, and perhaps lineages SAG-O19 and NAC11-7 as well. Several other sugar uptake pathways, however, are completely or largely missing in the four dominant lineages and instead are present in a few cultured strains (Table 4). These include the raffinose/stachyose/melibiose

transport system (*msmEFG*), the maltose/maltodextrin transport system (*malEFG*), the glucose/mannose transport system (*gtsABC*), and the glycerol transport system (*glpVPQST*). In addition to the ABC transporters, bacteria often rely on another type of energy-intensive phosphotransferase system (PTS) for the uptake of various monosaccharides, disaccharides, amino sugars, polyols, and other sugar derivatives (4), and this system is universal among Roseobacters.

All analyzed genomes encode similar potential for organic acid uptake through secondary transporters (Table 4). For instance, the tripartite ATP-independent periplasmic (TRAP) transporter (*dctPQM*) (5) for the uptake of the C<sub>4</sub>-dicarboxylate compounds (e.g., malate, fumarate, succinate) and the tripartite tricarboxylate transporter (TTT) system (*tctABC*) for the uptake of tricarboxylic acids, as well as their regulatory genes (*dctBD* and *tctDE*, respectively) are prevalent among all these pelagic Roseobacters. Utilization of aromatic compounds derived from vascular plant as a carbon source is another important feature of Roseobacters (6). The key gene encoding an aromatic-ring-cleaving enzyme, protocatechuate 3,4-dioxygenase (*pcaH*) (7), is present in the SAG-O19 and DC5-80-3 lineages and in four of the six cultured genomes (Table 4). Likewise, The feruloyl-CoA synthetase (*ferA*) crucial for the degradation of ferulic acid in lignin (8) is similarly preserved among these Roseobacters.

#### *Nitrogen, phosphorus, and iron acquisition, and vitamin synthesis*

The ocean surface waters in general are a nitrogen (N)-limiting environment (9). Extracellular proteins are an important N source for marine microbes. This is evident by using the activity of leucine aminopeptidase (*pepL*) as a proxy for the potential of extracellular peptide use (10). This gene, along with those encoding other

aminopeptidases such as proline aminopeptidase (*pepP*), alanine aminopeptidase (*pepN*), and methionine aminopeptidase (*pepM*), are consistently present in all Roseobacters analyzed here, suggesting that extracellular proteins may be a common substrate for pelagic Roseobacters. Other genes universal to these Roseobacters for the uptake of nitrogenous compounds include the high-affinity ammonium transporter (*amtB*), the L-amino acid transport system (*aapJQMP*), the branched amino acid transport system (*livGFHMK*), assimilation of amine into glutamine (*glnA*) and glutamate (*gltBD*), and their regulatory system P-II (*glnBD*, *ntrBC*) and the *ntrXY* two-component system.

The polyamine compounds (e.g., spermidine, putrescine, cadaverine, norspermidine, and spermine) comprise an important N source for marine bacteria (11). These compounds are taken by the spermidine-preferential (*potABCD*) and the putrescine-specific (*potFGHI*) uptake systems (12, 13). At least one of these transporters was identified in each of the Roseobacters analyzed here. Another important nitrogenous compound is urea, making up to over 50% of total N uptake by planktonic community in some ocean regions (14, 15). The genes encoding urease (*ureABCDEFG*) are missing only in one dominant lineage (NAC11-7) and one cultured strain (Y4I), though not all urease-containing Roseobacters carry genes for urea transporters (*urtABCDE*). Opines are derivatives of amino acids and thus likely to be a relevant N source for some ocean bacteria such as SAR11 (16), but it may not be used by pelagic Roseobacters, since the relevant transporter systems (*occTPMQ*) are missing in all of them. Utilization of nitrate/nitrite as N sources involves genes encoding nitrate/nitrite transport system (*nasDEF*) and assimilatory nitrate reductase (*nasA*) and nitrite reductase (*nirB*). These are completely missing in lineages SAG-O19, DC5-80-3, and NAC11-7 and four out of the

six cultured pelagic strains (Table 4). The presence of the transporter but absence of the reductases in CHAB-I-5 is likely due to the incomplete genome recovery, and further sequencing is needed to validate this hypothesis.

Inorganic phosphate is the preferred phosphorus (P) source for marine microbes, but it is often depleted in surface water and even below the detection limit in some regions, such as Sargasso Sea and Mediterranean Sea (17, 18). Under phosphate starving condition, bacteria often use the high-affinity phosphate transport system (*pstABCS*) for uptake of phosphate. This system was identified in all the Roseobacters except lineage NAC11-7. In addition, bacteria explore phosphoesters through alkaline phosphatases (APases) (19, 20) and phosphonates via C-P lyase (*phnGHIJM*) (21), the latter mechanism is completely missing in the four largely uncultivated lineages. Among the three gene families (*phoA*, *phoX*, *phoD*) encoding APases, the *phoX* is present in CHAB-I-5 but missing in the other three dominant lineages, and the *phoA* and *phoD* are completely missing in all four major lineages. Notably, *phoX* allows Roseobacters to utilize phosphoesters at low concentration (22), and thus may confer an ecological advantage for CHAB-I-5 to thrive in P depleted waters. These genes are better represented in the cultured pelagic strains. While *phoA* is completely missing, *phoX*, *phoD*, and C-P lyase were found in at least half of the six cultured pelagic strains (Table 4).

Iron and vitamin often becomes limiting to ocean microbes (9, 23). The iron (III) transport system (*afuAB*) and the ferrous iron transporter (*feoB*) were identified in lineage CHAB-I-5. These genes are largely missing in the other three dominant lineages, except the *afuA* found in SAG-O19 and the *afuB* in NAC11-7. They are similarly infrequent in

the six cultured pelagic Roseobacters (Table 4). For example, the *afuAB* system is only present in HTCC2516 but incomplete in GAI101 and CCS1, and the *feoB* system is missing in all the six genomes. Some other iron transporters were exclusively found in the cultured strains, though they are all rare. The iron (III) dicitrate transporter (*fecA*) and the iron permease (*ftrI*), for instance, are present only in one and two strains, respectively. Siderophore and heme are important iron-binding ligands in a few Roseobacter strains (24, 25). The gene clusters encoding the heme uptake system, the siderophore biosynthesis, and the siderophore transporter are completely missing in the four largely uncultivated lineages. While the former two clusters are similarly rare in the six cultured pelagic strains, the siderophore transport system is present in four of them. All the Roseobacters analyzed here are likely to make vitamin B<sub>12</sub> (cobalamin) and B<sub>6</sub> (pyridoxine), since the key genes for synthesizing the former (*cobCK*) and the latter (*pdxHJ*) are universal to them. By contrast, the key genes responsible for vitamin B<sub>1</sub> (thiamine; *thiCL*) and B<sub>7</sub> (biotin; *bioB*) biosynthesis are missing in all the dominant lineages, and present in a subset of the six cultured pelagic strains (Table 4).

## References

1. **Giebel H-A, Kalhoefer D, Gahl-Janssen R, Choo Y-J, Lee K, Cho J-C, Tindall BJ, Rhiel E, Beardsley C, Aydogmus ÖO, Voget S, Daniel R, Simon M, Brinkhoff T.** 2013. *Planktomarina temperata* gen. nov., sp. nov., belonging to the globally distributed RCA cluster of the marine *Roseobacter* clade, isolated from the German Wadden Sea. *International Journal of Systematic and Evolutionary Microbiology* **63**:4207-4217.
2. **Wiegmann K, Hensler M, Wöhlbrand L, Ulbrich M, Schomburg D, Rabus R.** 2014. Carbohydrate catabolism in *Phaeobacter inhibens* DSM 17395, a member of the marine *Roseobacter* clade. *Applied and Environmental Microbiology* doi:10.1128/aem.00719-14.
3. **Ruiz-Ponte C, Cilia V, Lambert C, Nicolas JL.** 1998. *Roseobacter gallaeciensis* sp. nov., a new marine bacterium isolated from rearings and collectors of the scallop *Pecten maximus*. *Int J Syst Bacteriol* **48**:537-542.
4. **Kotrba P, Inui M, Yukawa H.** 2001. Bacterial phosphotransferase system (PTS) in carbohydrate uptake and control of carbon metabolism. *Journal of Bioscience and Bioengineering* **92**:502-517.
5. **Mulligan C, Fischer M, Thomas GH.** 2011. Tripartite ATP-independent periplasmic (TRAP) transporters in bacteria and archaea. *FEMS Microbiol Rev* **35**:68-86.
6. **Buchan A, Gonzalez JM, Moran MA.** 2005. Overview of the marine *Roseobacter* lineage. *Applied and Environmental Microbiology* **71**:5665-5677.
7. **Buchan A, Collier LS, Neidle EL, Moran MA.** 2000. Key aromatic-ring-cleaving enzyme, protocatechuate 3,4-dioxygenase, in the ecologically important marine *Roseobacter* lineage. *Applied and Environmental Microbiology* **66**:4662-4672.
8. **Masai E, Harada K, Peng X, Kitayama H, Katayama Y, Fukuda M.** 2002. Cloning and characterization of the ferulic acid catabolic genes of *Sphingomonas paucimobilis* SYK-6. *Applied and Environmental Microbiology* **68**:4416-4424.
9. **Moore CM, Mills MM, Arrigo KR, Berman-Frank I, Bopp L, Boyd PW, Galbraith ED, Geider RJ, Guieu C, Jaccard SL, Jickells TD, La Roche J, Lenton TM, Mahowald NM, Maranon E, Marinov I, Moore JK, Nakatsuka T, Oschlies A, Saito MA, Thingstad TF, Tsuda A, Ulloa O.** 2013. Processes and patterns of oceanic nutrient limitation. *Nature Geosci* **6**:701-710.
10. **Nagata T.** 2008. Organic matter-bacteria interactions in seawater. *In* Kirchman DL (ed), *Microbial ecology of the oceans*. John Wiley & Sons, New Jersey.
11. **Lee C, Jørgensen NG.** 1995. Seasonal cycling of putrescine and amino acids in relation to biological production in a stratified coastal salt pond. *Biogeochemistry* **29**:131-157.
12. **Terui Y, Saroj S, Sakamoto A, Yoshida T, Higashi K, Kurihara S, Suzuki H, Toida T, Kashiwagi K, Igarashi K.** 2014. Properties of putrescine uptake by PotFGHI and PuuP and their physiological significance in *Escherichia coli*. *Amino Acids* **46**:661-670.

13. **Hanfrey CC, Pearson BM, Hazeldine S, Lee J, Gaskin DJ, Woster PM, Phillips MA, Michael AJ.** 2011. Alternative spermidine biosynthetic route is critical for growth of *Campylobacter jejuni* and is the dominant polyamine pathway in human gut microbiota. *The Journal of Biological Chemistry* **286**:43301-43312.
14. **Kudela RM, Cochlan WP.** 2000. Nitrogen and carbon uptake kinetics and the influence of irradiance for a red tide bloom off southern California. *Aquatic Microbial Ecology* **21**:31-47.
15. **Solomon CM, Collier JL, Berg GM, Glibert PM.** 2010. Role of urea in microbial metabolism in aquatic systems: a biochemical and molecular review. *Aquatic Microbial Ecology* **59**:67-88.
16. **Smith DP, Thrash JC, Nicora CD, Lipton MS, Burnum-Johnson KE, Carini P, Smith RD, Giovannoni SJ.** 2013. Proteomic and transcriptomic analyses of "*Candidatus Pelagibacter ubique*" describe the first PII-independent response to nitrogen limitation in a free-living Alphaproteobacterium. *mBio* **4**:e00133-00112.
17. **Wu J, Sunda W, Boyle EA, Karl DM.** 2000. Phosphate Depletion in the Western North Atlantic Ocean. *Science* **289**:759-762.
18. **Thingstad TF, Krom MD, Mantoura RFC, Flaten GAF, Groom S, Herut B, Kress N, Law CS, Pasternak A, Pitta P, Psarra S, Rassoulzadegan F, Tanaka T, Tselepidis A, Wassmann P, Woodward EMS, Riser CW, Zodiatis G, Zohary T.** 2005. Nature of phosphorus limitation in the ultraoligotrophic eastern Mediterranean. *Science* **309**:1068-1071.
19. **Duhamel S, Bjorkman KM, Wambeke FV, Moutin T, Karl DM.** 2011. Characterization of alkaline phosphatase activity in the North and South Pacific Subtropical Gyres: Implications for phosphorus cycling. *Limnology and Oceanography* **56**:1244-1254.
20. **Martinez J, Smith DC, Steward GF, Azam F.** 1996. Variability in ectohydrolytic enzyme activities of pelagic marine bacteria and its significance for substrate processing in the sea. *Aquatic Microbial Ecology* **10**:223-230.
21. **Dyhrman ST, Chappell PD, Haley ST, Moffett JW, Orchard ED, Waterbury JB, Webb EA.** 2006. Phosphonate utilization by the globally important marine diazotroph *Trichodesmium*. *Nature* **439**:68-71.
22. **Sebastian M, Ammerman JW.** 2011. Role of the phosphatase PhoX in the phosphorus metabolism of the marine bacterium *Ruegeria pomeroyi* DSS-3. *Environmental Microbiology Reports* **3**:535-542.
23. **Sañudo-Wilhelmy SA, Cutter LS, Durazo R, Smail EA, Gómez-Consarnau L, Webb EA, Prokopenko MG, Berelson WM, Karl DM.** 2012. Multiple B-vitamin depletion in large areas of the coastal ocean. *Proceedings of the National Academy of Sciences* **109**:14041-14045.
24. **Thole S, Kalhoefer D, Voget S, Berger M, Engelhardt T, Liesegang H, Wollherr A, Kjelleberg S, Daniel R, Simon M, Thomas T, Brinkhoff T.** 2012. *Phaeobacter gallaeciensis* genomes from globally opposite locations reveal high similarity of adaptation to surface life. *ISME J* **6**:2229-2244.

25. **Roe KL, Hogle SL, Barbeau KA.** 2013. Utilization of heme as an iron source by marine *Alphaproteobacteria* in the *Roseobacter* Clade. *Applied and Environmental Microbiology* **79**:5753-5762.



## Supplemental Figure Legends

**Figure S1.** The maximum likelihood 16S rRNA gene tree of cultured Roseobacters and the uncultivated lineages (CHAB-I-5, SAG-O19, DC5-80-3, NAC11-7). Numbers near the uncultivated lineages are bootstrap values of these branches. The five single cells sequenced in the present study are marked with star.

**Figure S2.** Estimate of the complete genome size of the five new single-cell amplified genomes (red) based on a polynomial regression model ( $R^2=0.95$ ). The 95% prediction interval (PI) is also shown. The x axis shows the ratio of the number of conserved single-copy genes universally present in fully sequenced Roseobacter genomes to the number of predicted protein-coding genes in a genome; the y axis is the number of nucleotides sequenced.

**Figure S3.** Estimate of the relative abundance of the Roseobacter clade in bacterioplankton communities in global oceans. The equator and boundaries of the main climate zones (tropic, temperate, polar) are marked in dashed lines. Each solid dot represents at least one metagenomic samples observed within the  $\pm 0.5^\circ$  latitude/longitude range represented by the center of the dot, and is colored according to the relative abundance of a particular lineage in the Roseobacter community.

**Figure S4.** Geographic distribution of samples. The genomic samples of the four largely uncultivated *Roseobacter* lineages are colored, and the metagenomic samples from are symbolized using various shapes. Round circles represent samples from GOS, GOS Baltic Sea and GOS Banyoles projects; Xs represent GOM project; Top-up triangles represent CalCOFI project; Asterisks represent Tara Ocean Expedition project; Crosses represent metagenome data from Monterey Bay; Top-down triangles represent data from Western Channel; Left-pointing triangles represent microbial community studies of North Atlantic Spring Bloom; Right-pointing triangle represent metagenome data for marine bacterioplankton; Squares represent studies for microbial community in a shallow-sea hydrothermal system near Kueishantao; Rhombuses represent samples from the Hawaii Ocean Time-series (HOT) station ALOHA, as well as data from Mediterranean deep chlorophyll maximum studies; Stars represent the Antarctica aquatic microbial metagenome project (Table S2).

**Figure S5.** Photosynthetic gene cluster (PGC) structure and arrangement in *Roseobacters*. Green: *bch* genes; orange: *crt* genes; red: *puf* and regulators genes; pink: *puh* genes; cyan: *pucC* genes; black: *acsf* genes; blue: *hem* and *cyc* genes; yellow: *LhaA* genes; white: uncertain or unrelated genes. The horizontal arrows represent putative transcripts. According to the orientation of the two conserved regions, the

PGCs are divided into three different groups. type I, forward *bchFNBHLM-LhaA-puh* plus forward *crtF-bchCXYZ-puf*; type II, forward *bchFNBHLM-LhaA-puh* plus reverse *crtF-bchCXYZ-puf*; type III, forward *crtF-bchCXYZ-puf* plus forward *bchFNBHLM-LhaA-puh*. Double slash indicates the genes are located outside the PGC.

**Figure S6.** RAxML Maximum likelihood phylogenetic analysis of the four types of NRPS/PKS proposed by Martens et al., *Microb. Ecol.* 54:31-42, 2007. Among the four largely uncultivated *Roseobacter* lineages and the six cultured pelagic *Roseobacters*, only two genes (red) homologous to these NRPS/PKS were identified. Other *Roseobacter* sequences from Martens et al. 2007 are in blue.

Fig. S1

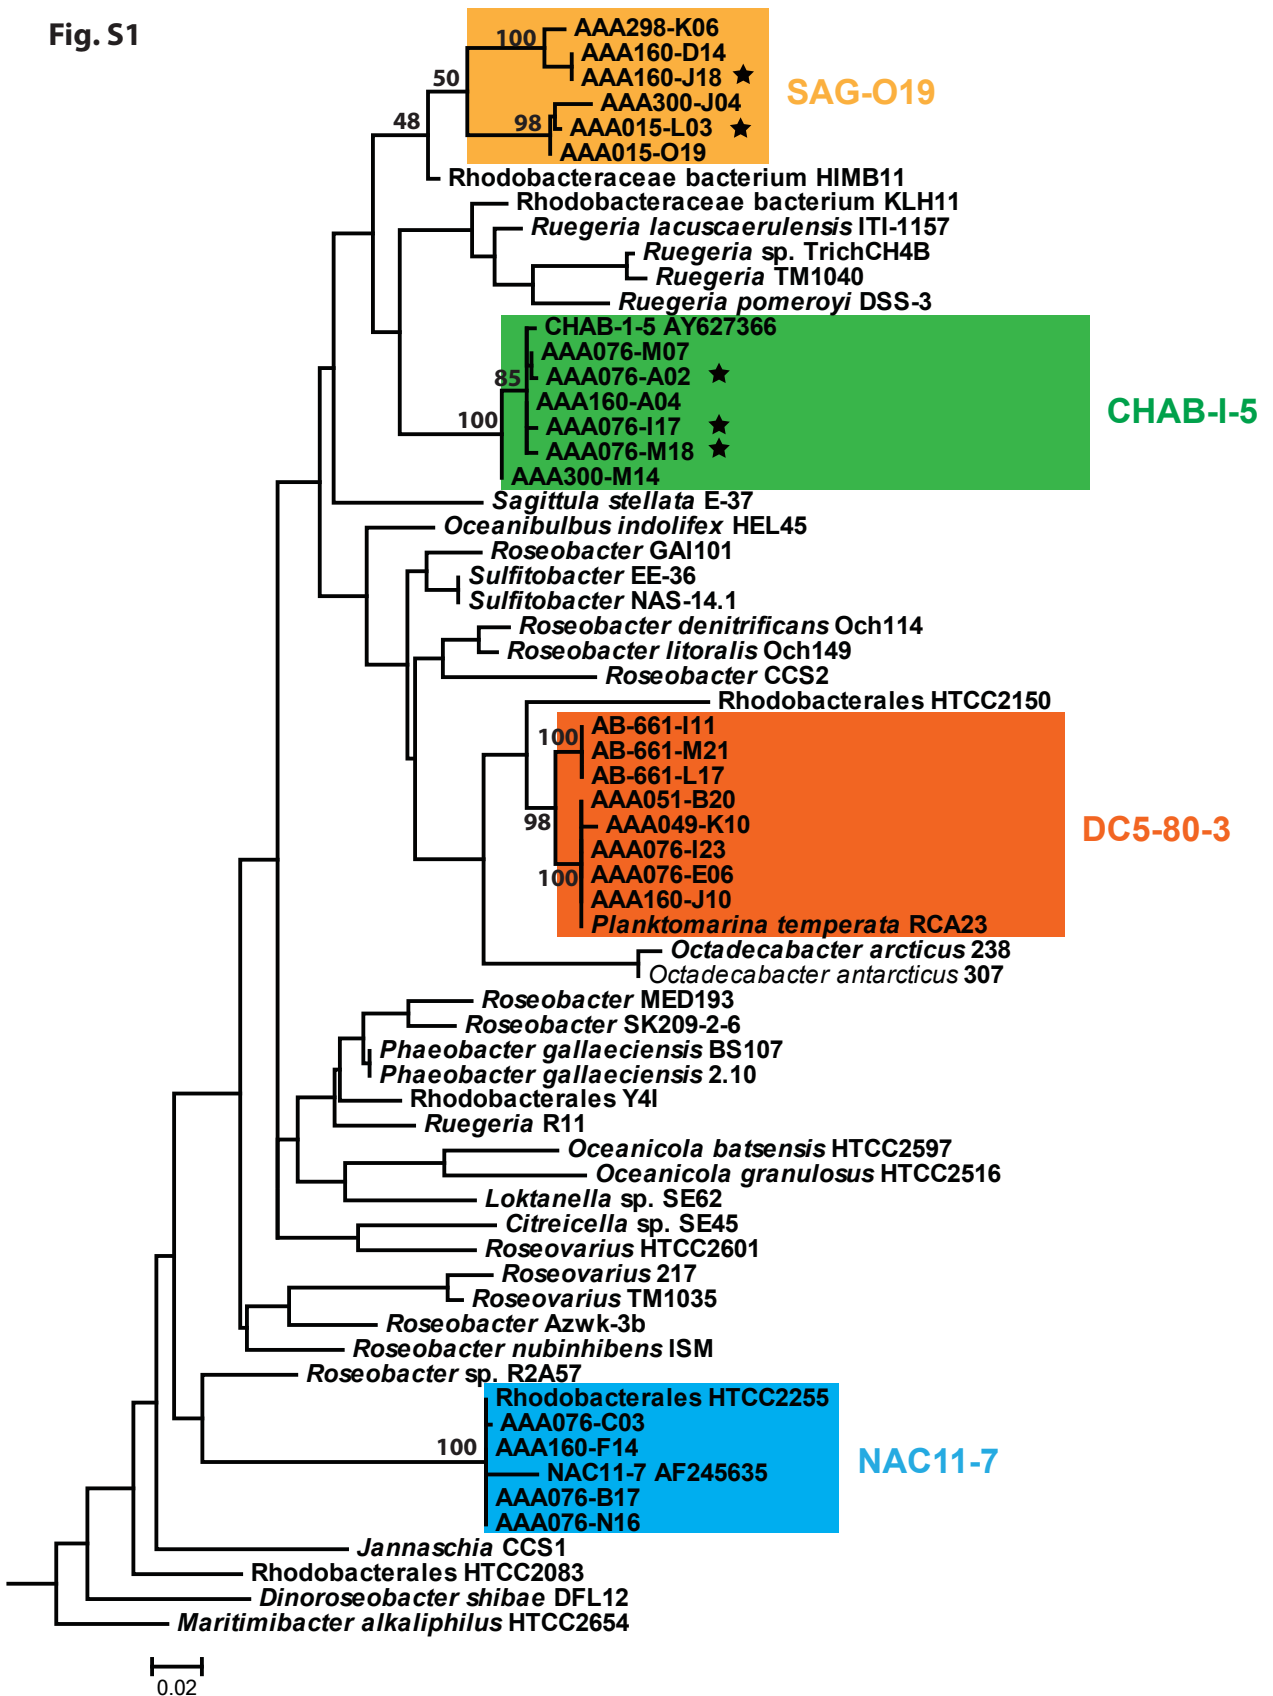

Fig. S2

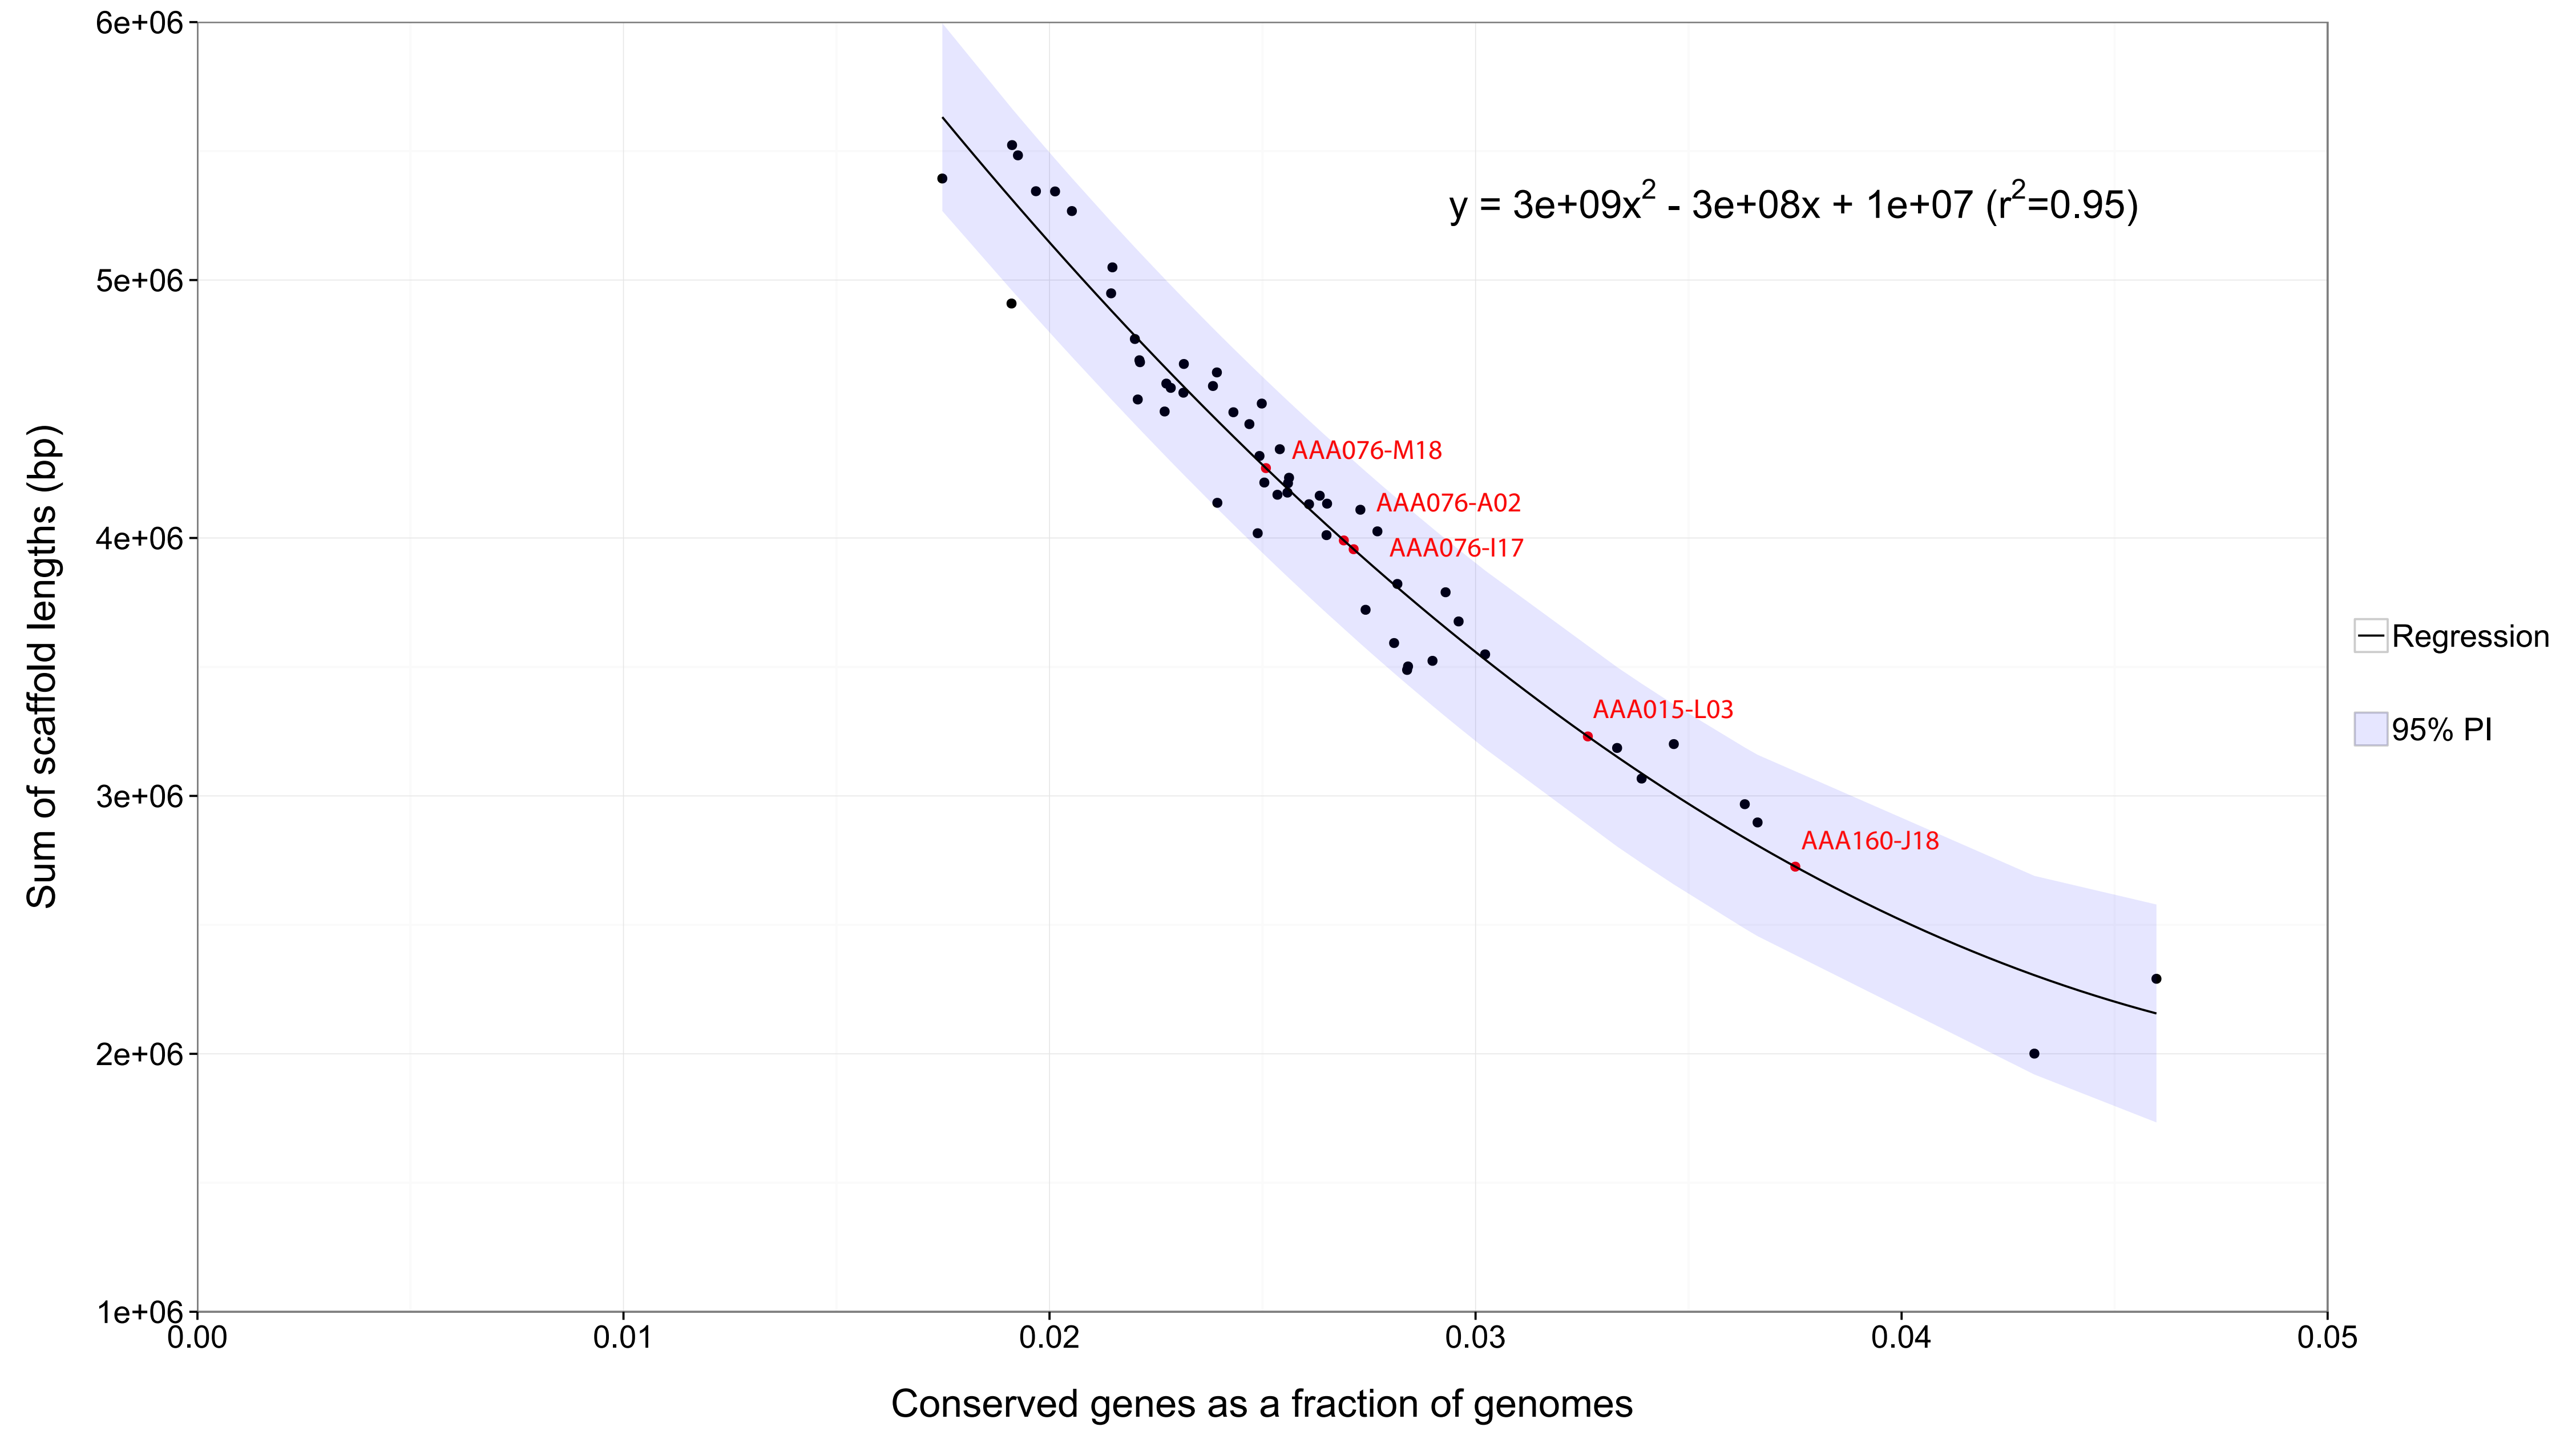

Fig. S3

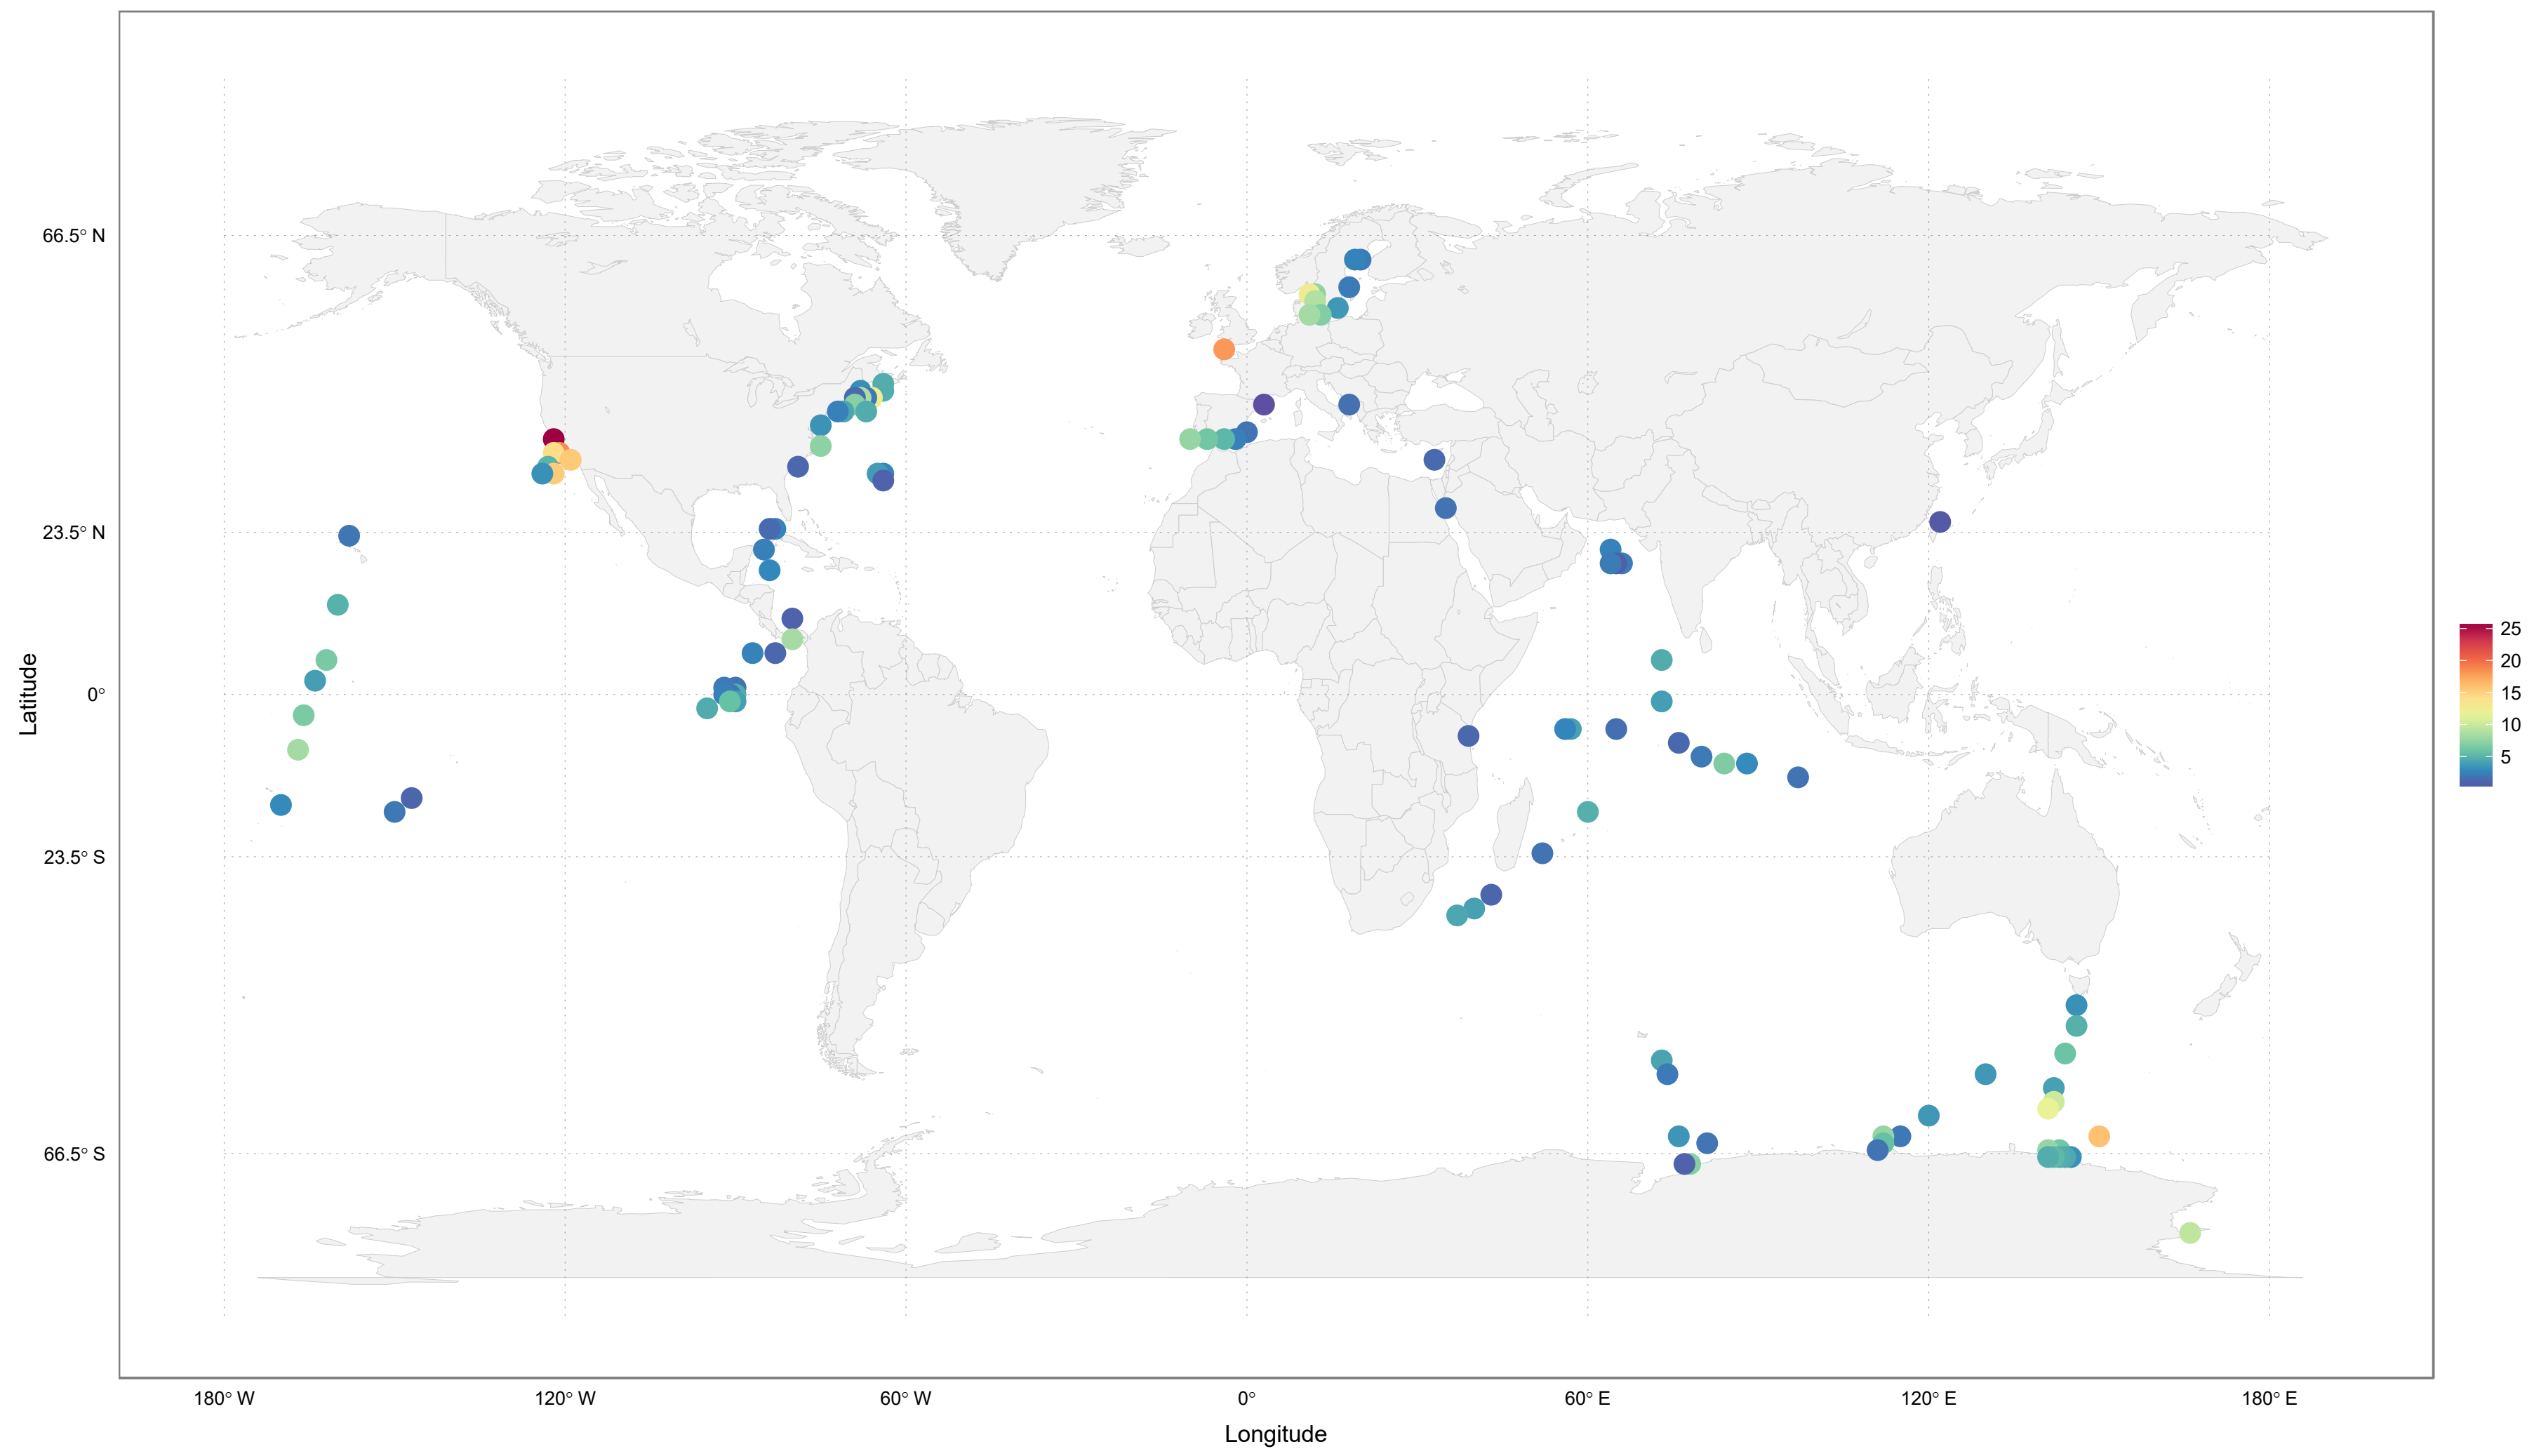

Fig. S4

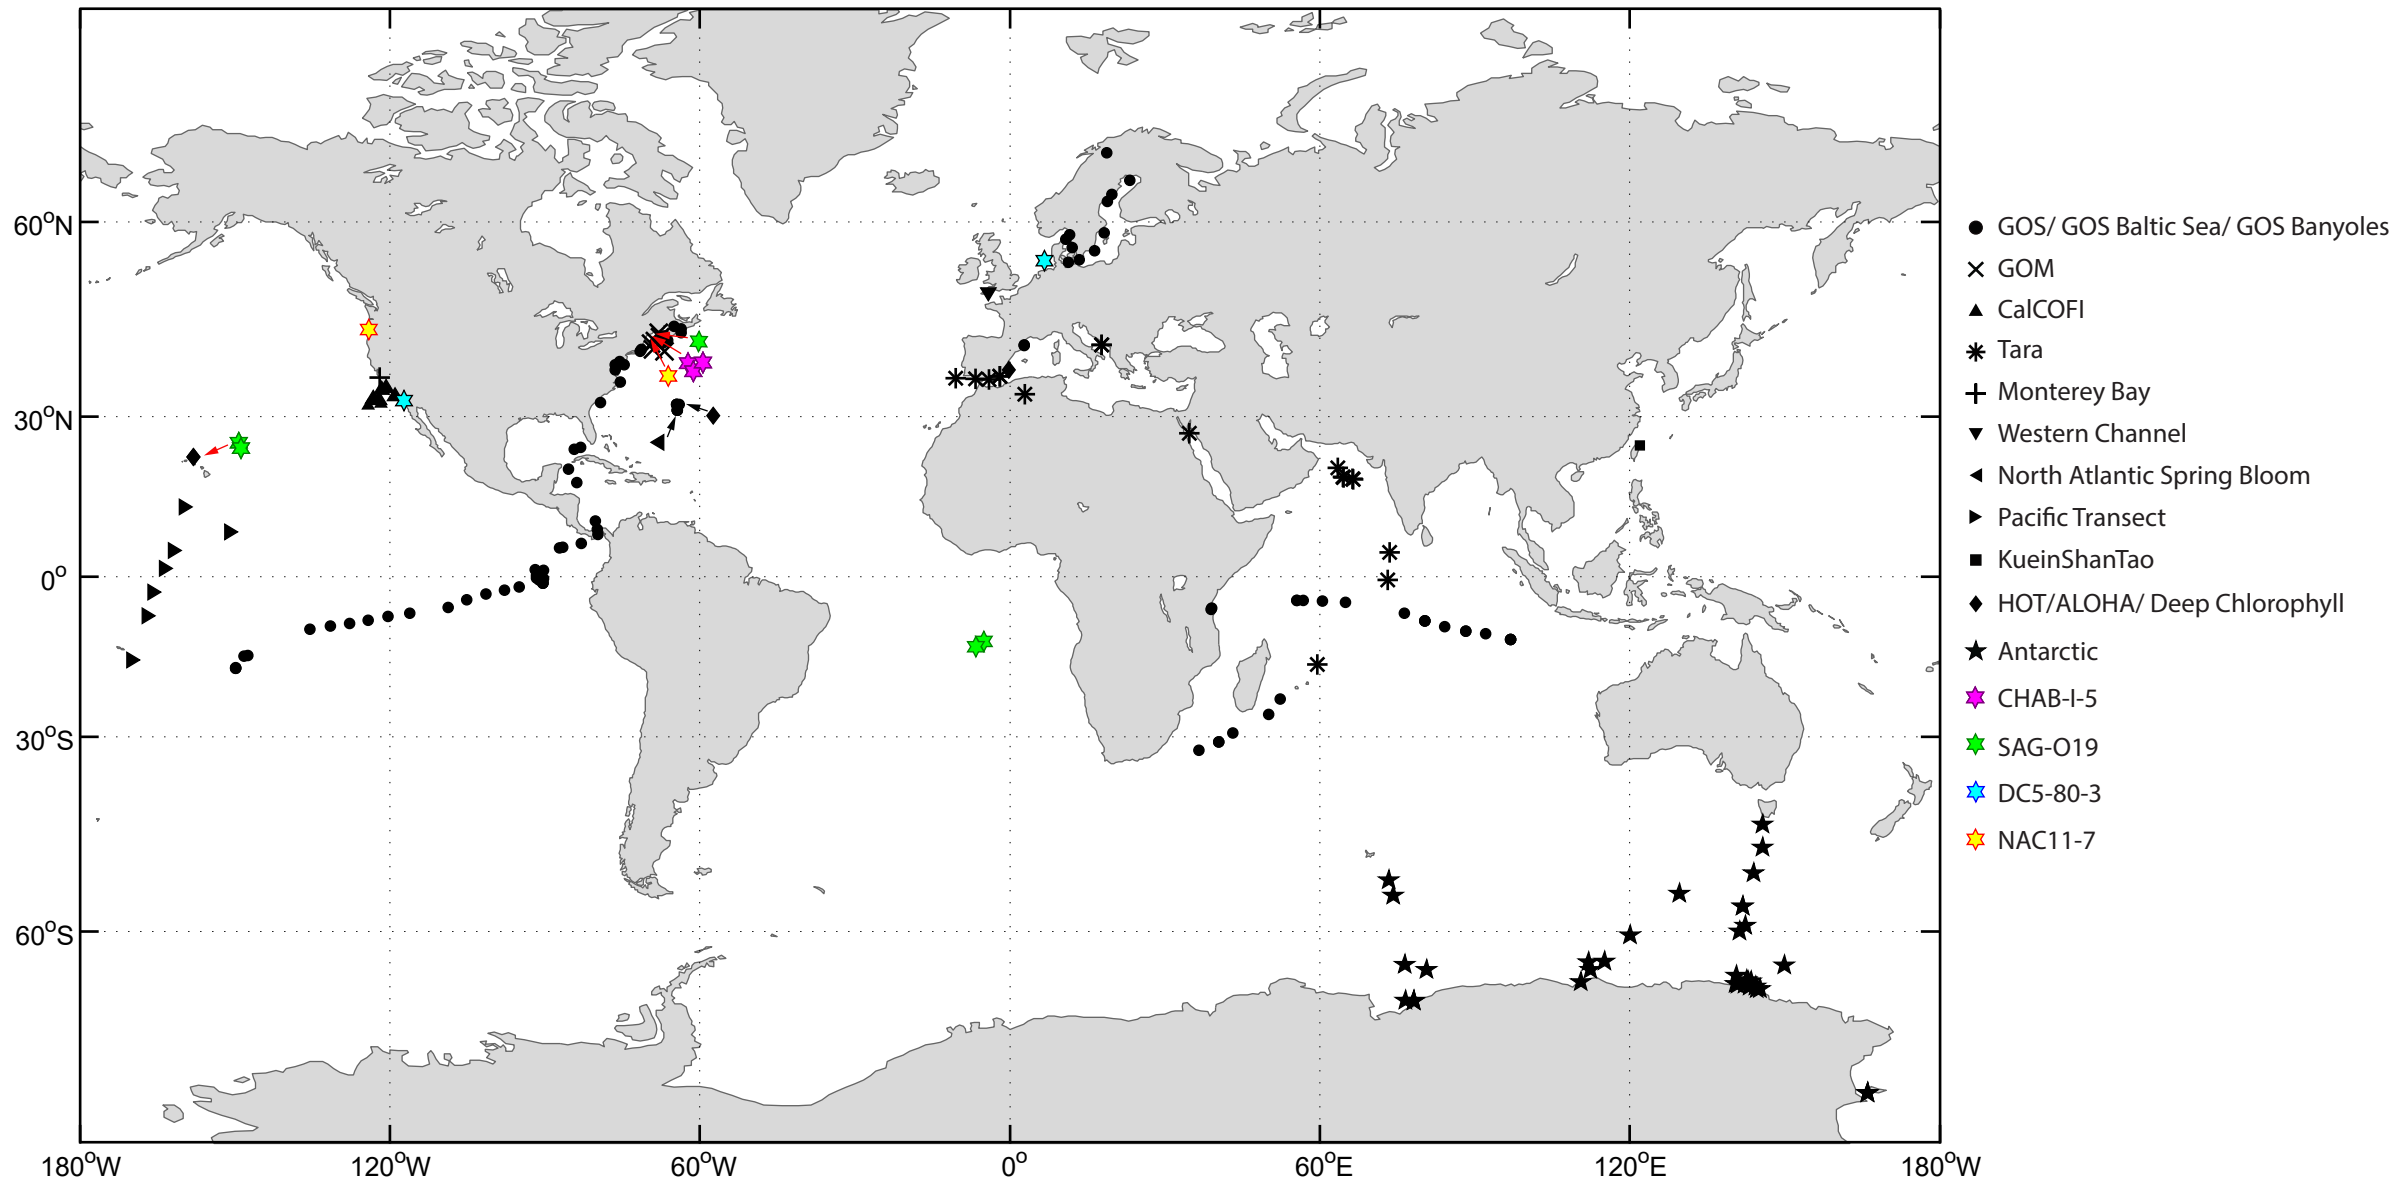

Fig. S5

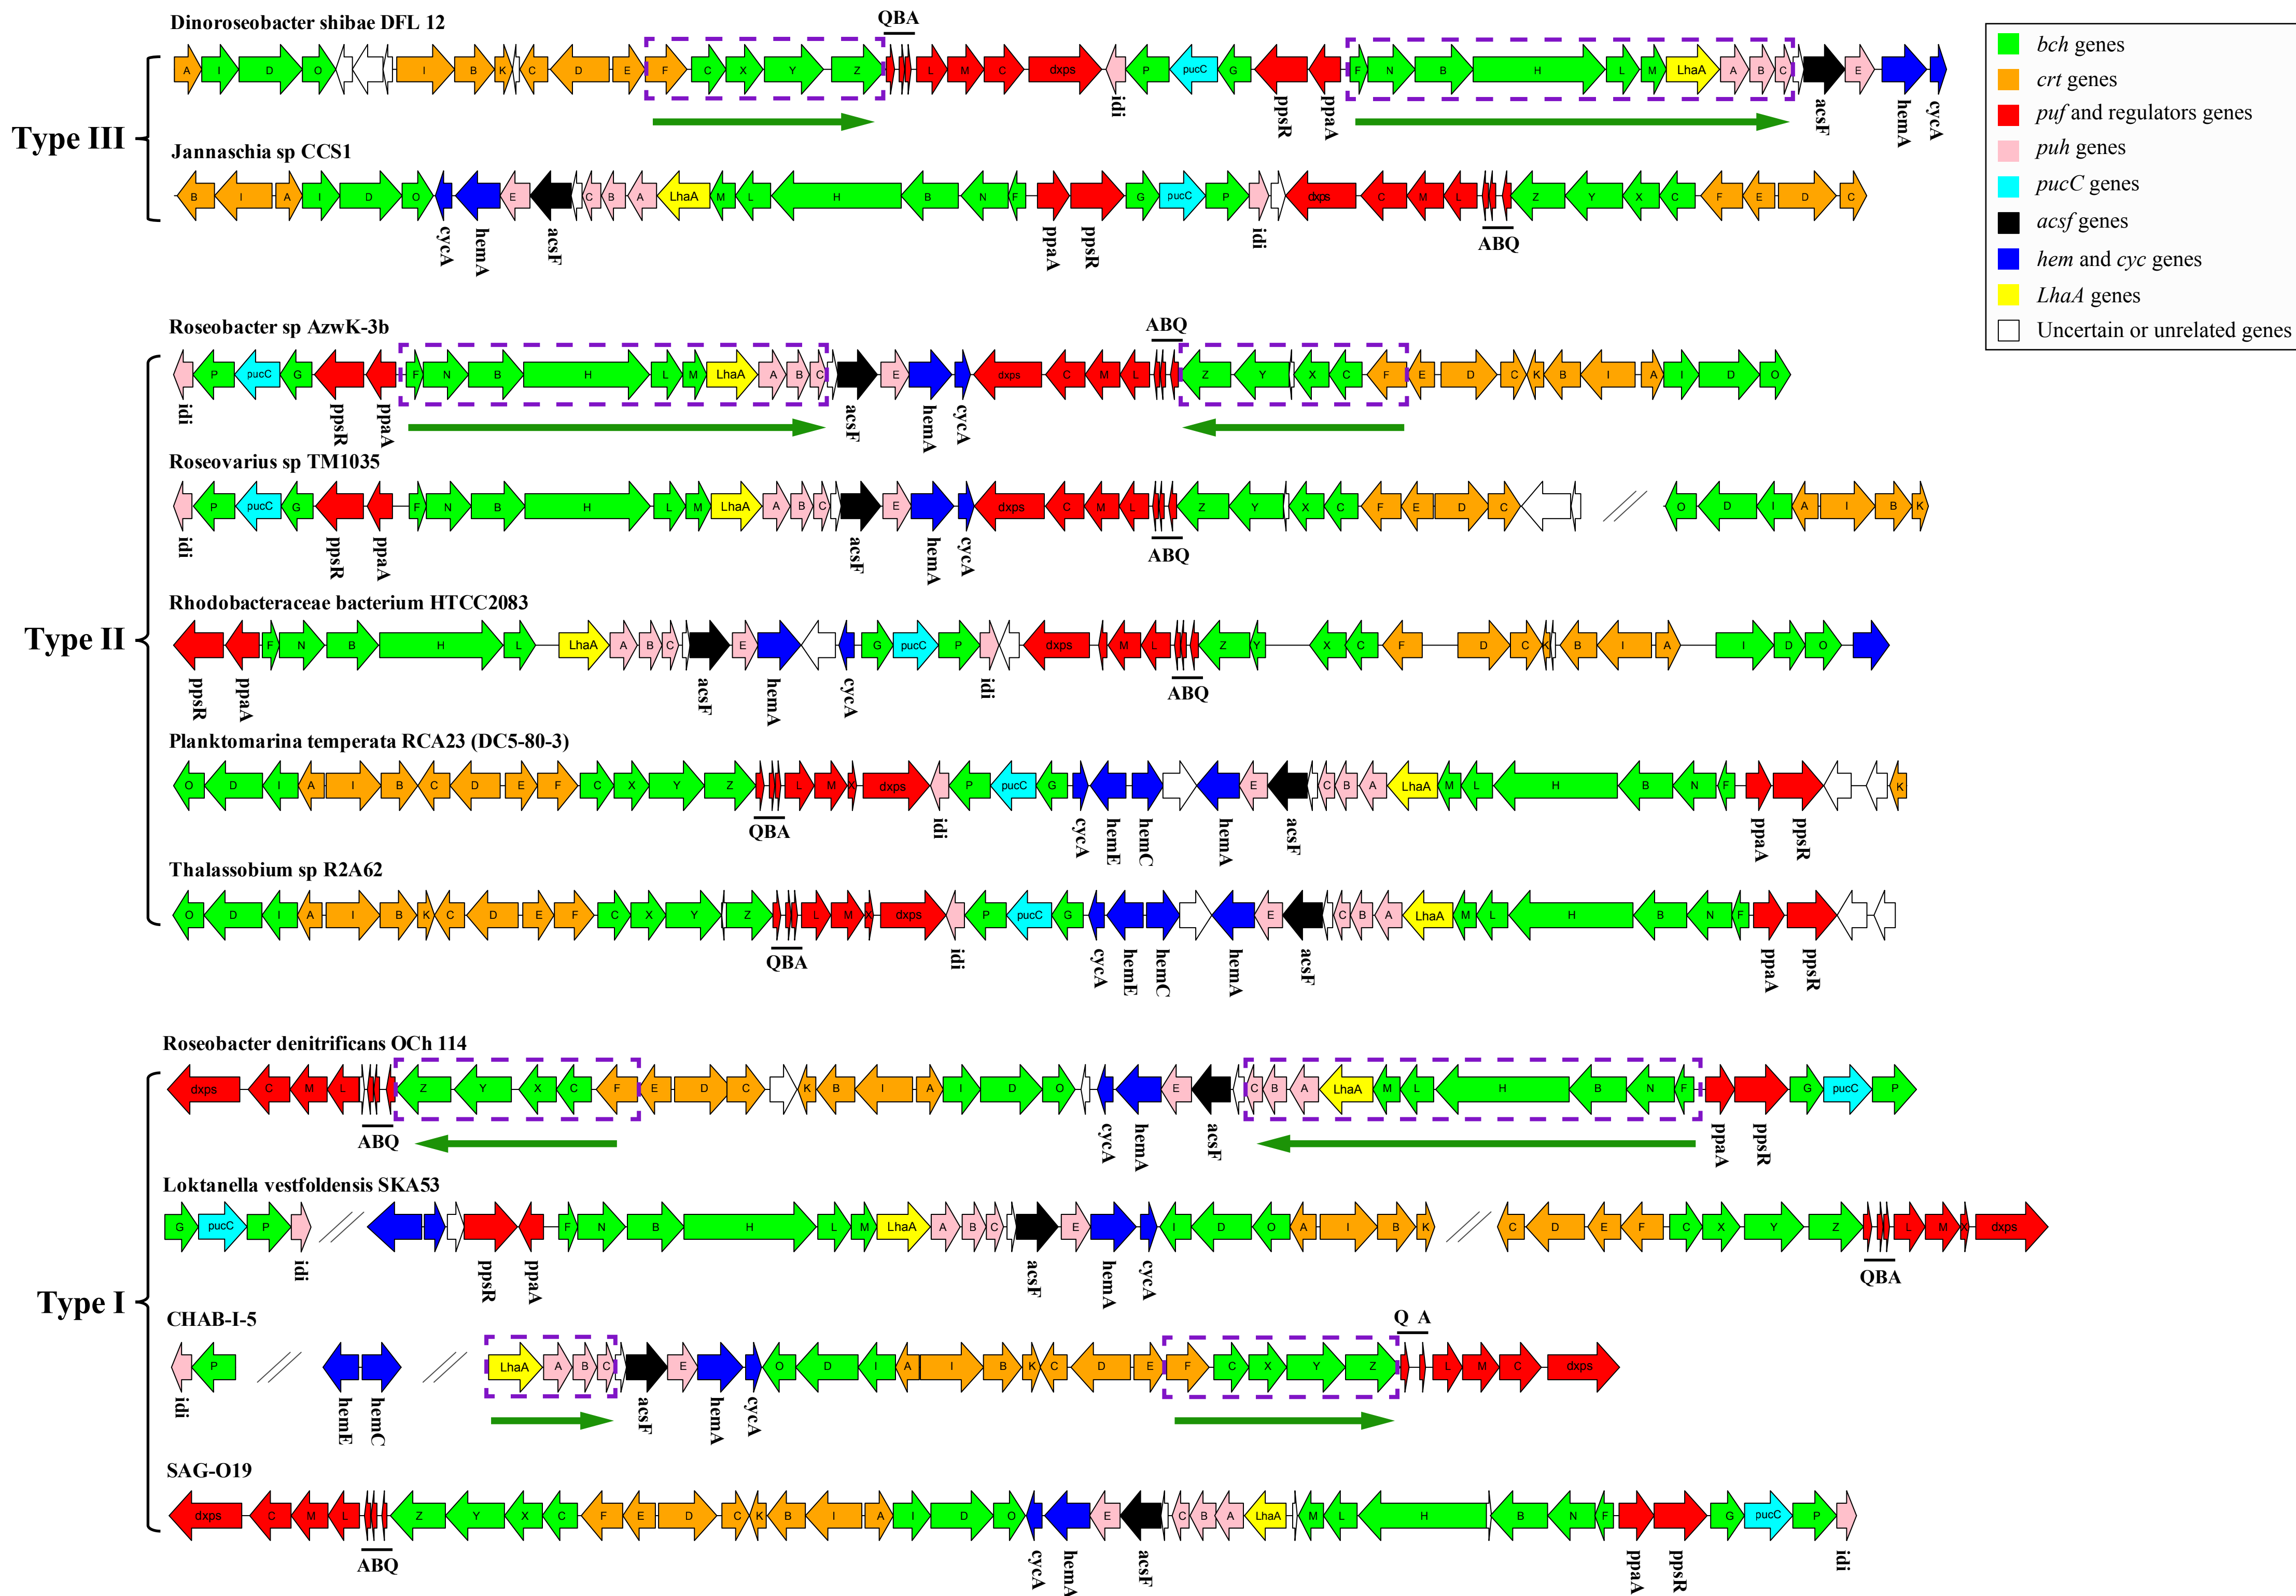



Fig. S6

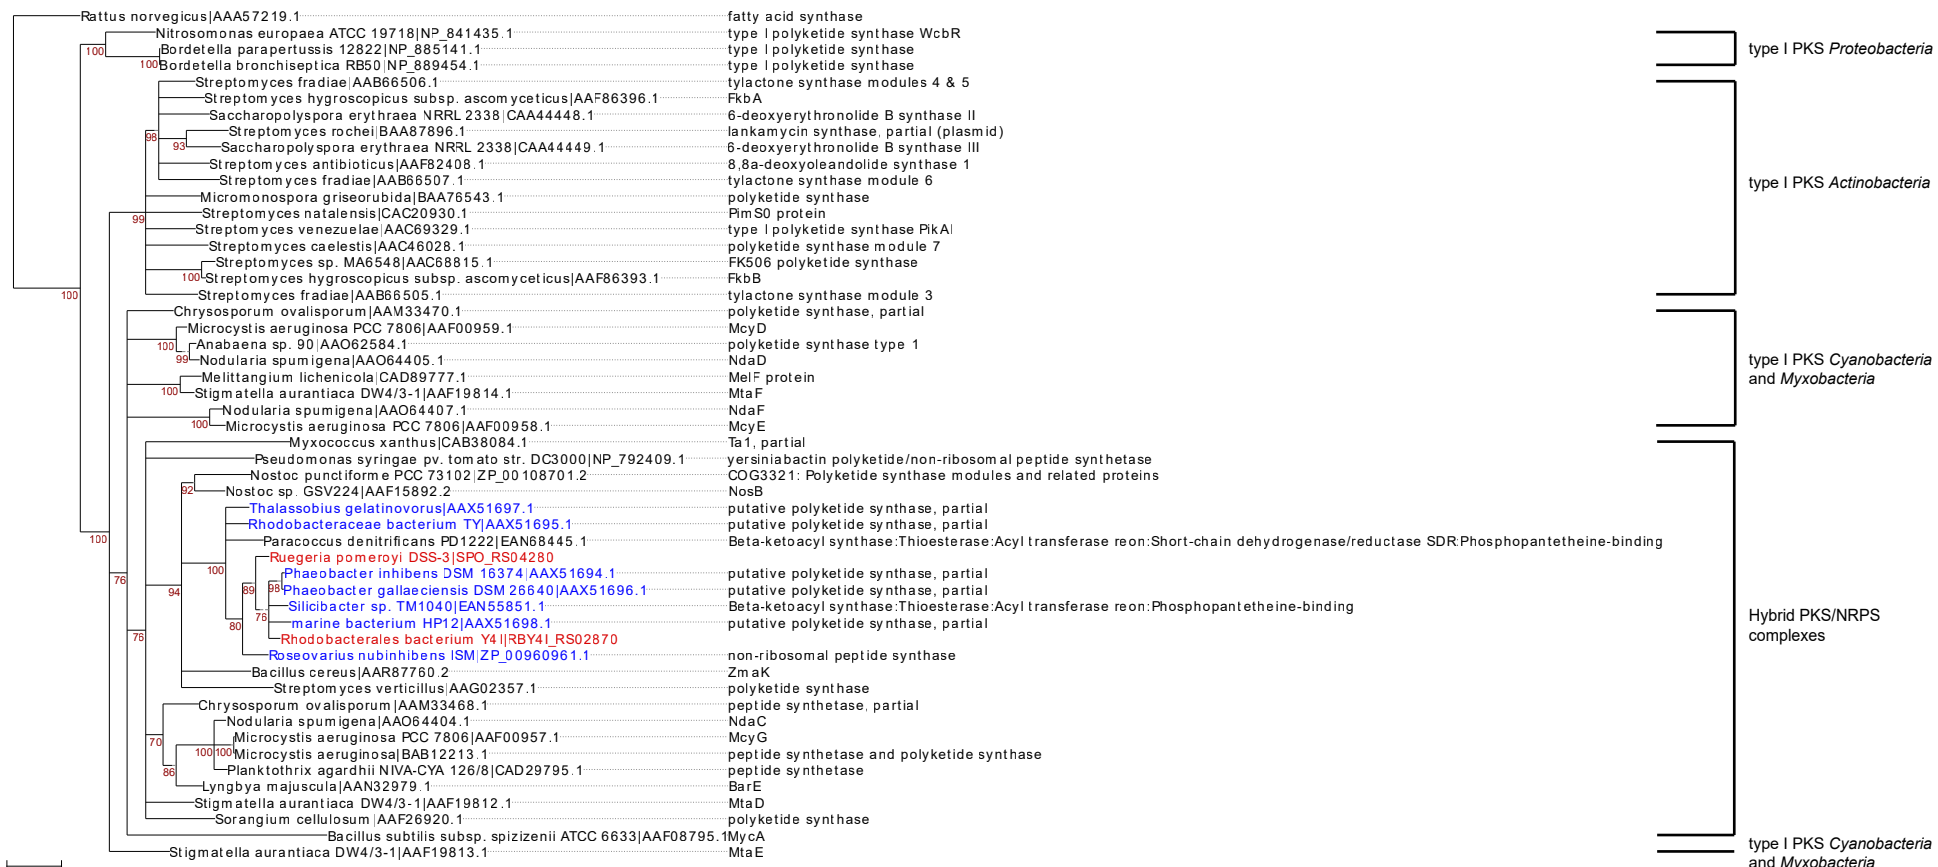

Table S1. Summary statistics of the five assembled single-cell amplified genomes

|                               | CHAB-I-5   |            |            | SAG-O19    |            |
|-------------------------------|------------|------------|------------|------------|------------|
|                               | AAA076-A02 | AAA076-M18 | AAA076-I17 | AAA015-L03 | AAA160-J18 |
| <b>Assembly Statistics</b>    |            |            |            |            |            |
| Assembly Size (Mbp)           | 1.89       | 2.32       | 3.14       | 1.18       | 2.21       |
| Estimated Genome Size (Mbp)   | 4.10       | 4.36       | 4.07       | 3.40       | 2.97       |
| Estimated Genome Recovery (%) | 46.02      | 53.15      | 77.31      | 34.71      | 74.41      |
| Number of Contigs             | 62         | 87         | 98         | 78         | 47         |
| Smallest Contig Size (Mbp)    | 0.002      | 0.002      | 0.002      | 0.002      | 0.002      |
| Largest Contig Size (Mbp)     | 0.32       | 0.31       | 0.33       | 0.07       | 0.33       |
| GC Content (%)                | 49.70      | 49.61      | 49.52      | 39.61      | 40.51      |
| N50 (Mbp)                     | 0.09       | 0.08       | 0.11       | 0.03       | 0.13       |
| <b>Non-Coding RNA</b>         |            |            |            |            |            |
| Number of tRNA                | 18         | 25         | 38         | 17         | 34         |
| Number of rRNA                | 0          | 3          | 3          | 3          | 3          |

Table S2 Metadata for the metagenomic datasets used to estimate the relative abundance of the CHAB-I-5, DC5-80-3, NAC11-7, and SAG-O19 lineages in the pelagic Roseobacter communities.

Part I. Project Information and Statistics

| Full Name of The Project                    | PubID    | iMicrobeID | # Raw Reads | # Qualified Reads | Length (bp)    |
|---------------------------------------------|----------|------------|-------------|-------------------|----------------|
| Antarctica Aquatic Microbial Metagenome     | 21124488 | 4          | 64,626,265  | 56,769,086        | 21,885,405,020 |
| CalCOFI Project                             | 22278668 | NA         | 4,247,911   | 3,587,839         | 1,008,676,775  |
| Deep Chlorophyll Maximum Metagenome         | 20393571 | 116        | 1,204,321   | 1,072,794         | 301,092,101    |
| Kueishantao Shallow-Sea Hydrothermal System | 23940820 | NA         | 565,611     | 557,579           | 211,344,022    |
| Gulf of Maine                               | 22050608 | NA         | 2,810,805   | 2,807,924         | 2,832,208,962  |
| Global Ocean Sampling Expedition (GOS)      | 17504484 | 26         | 12,672,518  | 12,453,518        | 11,555,226,255 |
| Global Ocean Sampling Baltic Sea            | NA       | 114        | 23,909,459  | 20,325,101        | 7,775,555,569  |
| Global Ocean Sampling Banyoles              | NA       | 125        | 3,990,132   | 3,658,922         | 1,462,065,025  |
| Microbial Community at the HOT/ALOHA        | 16439655 | 31         | 5,234,409   | 4,425,531         | 1,519,175,594  |
| Marine Bacterioplankton Metagenomes         | 19444203 | 7          | 1,314,590   | 1,111,670         | 269,165,248    |
| Monterey Bay Microbial Study                | 17472632 | 48         | 1,200,014   | 1,073,521         | 265,391,390    |
| North Atlantic Spring Bloom                 | 22323811 | 6          | 6,784,781   | 5,496,974         | 1,308,920,188  |
| Tara Oceans Expeditions                     | 23575371 | NA         | 8,162,564   | 7,511,565         | 2,734,688,433  |
| Western Channel Observatory                 | 21124740 | 72         | 5,752,026   | 5,001,406         | 1,854,605,771  |
| Total                                       | -        | -          | 142,475,406 | 125,853,430       | 54,983,520,353 |

Part II. Metadata for Metagenome Data in Detail

| SAMPLE      | FILTER MIN (um) | FILTER MAX (um) | Latitude | Longitude | Sample Depth(m) | # Qualified Reads |
|-------------|-----------------|-----------------|----------|-----------|-----------------|-------------------|
| Station_368 | 0.1             | 0.8             | -44.72   | 145.76    | 2.00            | 549,926           |
| Station_368 | 0.8             | 3               | -44.72   | 145.76    | 2.00            | 205,939           |
| Station_368 | 3               | 200             | -44.72   | 145.76    | 2.00            | 205,939           |
| Station_367 | 0.1             | 0.8             | -48.25   | 145.81    | 2.00            | 553,511           |
| Station_367 | 0.8             | 3               | -48.25   | 145.81    | 2.00            | 414,686           |
| Station_367 | 3               | 200             | -48.25   | 145.81    | 2.00            | 366,697           |
| Station_366 | 0.1             | 0.8             | -52.02   | 144.07    | 2.00            | 604,892           |
| Station_366 | 0.8             | 3               | -52.02   | 144.07    | 2.00            | 180,763           |
| Station_366 | 3               | 200             | -52.02   | 144.07    | 2.00            | 248,417           |
| Station_394 | 0.1             | 0.8             | -53.02   | 73.38     | 1.00            | 438,254           |
| Station_394 | NA              | NA              | -53.02   | 73.38     | 1.00            | 424,739           |
| Station_386 | 0.1             | 0.8             | -54.95   | 129.62    | 1.00            | 458,352           |
| Station_386 | 0.8             | 3               | -54.95   | 129.62    | 1.00            | 138,789           |
| Station_386 | 3               | 200             | -54.95   | 129.62    | 1.00            | 298,965           |
| Station_393 | 0.1             | 0.8             | -55.26   | 74.26     | 1.00            | 737,147           |
| Station_393 | NA              | NA              | -55.26   | 74.26     | 1.00            | 400,756           |
| Station_364 | 0.1             | 0.8             | -56.70   | 141.87    | 2.00            | 569,669           |
| Station_364 | 0.8             | 3               | -56.70   | 141.87    | 2.00            | 190,720           |
| Station_364 | 3               | 200             | -56.70   | 141.87    | 2.00            | 240,416           |
| Station_365 | 0.1             | 0.8             | -56.70   | 141.88    | 3,693.00        | 633,520           |
| Station_365 | 0.8             | 3               | -56.70   | 141.88    | 3,693.00        | 232,482           |

|             |     |     |        |        |          |           |
|-------------|-----|-----|--------|--------|----------|-----------|
| Station_365 | 3   | 200 | -56.70 | 141.88 | 3,693.00 | 91,423    |
| Station_346 | 0.1 | 0.8 | -59.31 | 142.46 | 2.00     | 339,550   |
| Station_346 | 0.8 | 3   | -59.31 | 142.46 | 2.00     | 418,282   |
| Station_346 | 3   | 200 | -59.31 | 142.46 | 2.00     | 246,757   |
| Station_363 | 0.1 | 0.8 | -60.00 | 141.23 | 2.00     | 477,204   |
| Station_363 | 0.8 | 3   | -60.00 | 141.23 | 2.00     | 291,961   |
| Station_363 | 3   | 200 | -60.00 | 141.23 | 2.00     | 286,552   |
| Station_387 | 0.1 | 0.8 | -60.50 | 120.05 | 1.00     | 451,225   |
| Station_387 | NA  | NA  | -60.50 | 120.05 | 1.00     | 340,595   |
| Station_388 | 0.1 | 0.8 | -63.82 | 115.17 | 1.00     | 465,963   |
| Station_388 | NA  | NA  | -63.82 | 115.17 | 1.00     | 367,159   |
| Station_236 | 0.1 | 0.8 | -63.89 | 112.07 | 2.00     | 1,019,859 |
| Station_236 | 3   | 200 | -63.89 | 112.07 | 2.00     | 258,250   |
| Station_392 | 0.1 | 0.8 | -64.20 | 76.46  | 1.00     | 664,003   |
| Station_392 | 0.8 | 3   | -64.20 | 76.46  | 1.00     | 270,670   |
| Station_392 | 3   | 200 | -64.20 | 76.46  | 1.00     | 176,910   |
| Station_358 | 0.1 | 0.8 | -64.30 | 150.01 | 2.00     | 523,368   |
| Station_358 | 0.8 | 3   | -64.30 | 150.01 | 2.00     | 218,627   |
| Station_358 | 3   | 200 | -64.30 | 150.01 | 2.00     | 186,381   |
| Station_389 | 0.1 | 0.8 | -64.80 | 112.38 | 1.00     | 514,996   |
| Station_389 | NA  | NA  | -64.80 | 112.38 | 1.00     | 422,070   |
| Station_390 | 0.1 | 0.8 | -64.83 | 80.72  | 1.00     | 493,689   |
| Station_390 | NA  | NA  | -64.83 | 80.72  | 1.00     | 335,502   |
| Station_362 | 0.1 | 0.8 | -65.54 | 140.72 | 2.00     | 537,017   |
| Station_362 | 0.8 | 3   | -65.54 | 140.72 | 2.00     | 223,381   |
| Station_362 | 3   | 200 | -65.54 | 140.72 | 2.00     | 261,356   |
| Station_347 | 0.1 | 0.8 | -66.02 | 142.67 | 2.00     | 558,649   |
| Station_347 | 0.8 | 3   | -66.02 | 142.67 | 2.00     | 236,989   |
| Station_347 | 3   | 200 | -66.02 | 142.67 | 2.00     | 233,739   |
| Station_357 | 0.1 | 0.8 | -66.17 | 142.94 | 2.00     | 639,130   |
| Station_357 | 0.8 | 3   | -66.17 | 142.94 | 2.00     | 335,608   |
| Station_357 | 3   | 200 | -66.17 | 142.94 | 2.00     | 375,542   |
| Station_359 | 0.1 | 0.8 | -66.19 | 143.49 | 2.00     | 480,202   |
| Station_359 | 0.8 | 3   | -66.19 | 143.49 | 2.00     | 706,529   |
| Station_359 | 3   | 200 | -66.19 | 143.49 | 2.00     | 403,615   |
| Station_235 | 0.1 | 0.8 | -66.27 | 110.53 | 1.83     | 173,213   |
| Station_235 | 0.8 | 3   | -66.27 | 110.53 | 1.83     | 571,550   |
| Station_235 | 3   | 200 | -66.27 | 110.53 | 1.83     | 158,492   |
| Station_348 | 0.1 | 0.8 | -66.34 | 142.99 | 1.50     | 429,571   |
| Station_348 | 0.8 | 3   | -66.34 | 142.99 | 1.50     | 281,648   |
| Station_348 | 3   | 200 | -66.34 | 142.99 | 1.50     | 195,752   |
| Station_361 | 0.1 | 0.8 | -66.47 | 140.54 | 1,170.00 | 531,595   |
| Station_361 | 0.8 | 3   | -66.47 | 140.54 | 1,170.00 | 206,386   |
| Station_361 | 3   | 200 | -66.47 | 140.54 | 1,170.00 | 243,771   |
| Station_351 | 0.1 | 0.8 | -66.56 | 143.34 | 1.50     | 494,126   |
| Station_351 | 0.8 | 3   | -66.56 | 143.34 | 1.50     | 474,757   |
| Station_351 | 3   | 200 | -66.56 | 143.34 | 1.50     | 700,917   |
| Station_349 | 0.1 | 0.8 | -66.57 | 142.32 | 1.50     | 548,378   |
| Station_349 | 0.8 | 3   | -66.57 | 142.32 | 1.50     | 231,214   |
| Station_349 | 3   | 200 | -66.57 | 142.32 | 1.50     | 217,790   |
| Station_350 | 0.1 | 0.8 | -66.57 | 142.32 | 330.00   | 554,483   |
| Station_350 | 0.8 | 3   | -66.57 | 142.32 | 330.00   | 280,323   |
| Station_350 | 3   | 200 | -66.57 | 142.32 | 330.00   | 240,873   |
| Station_360 | 0.1 | 0.8 | -66.58 | 140.88 | 2.00     | 496,486   |
| Station_360 | 0.8 | 3   | -66.58 | 140.88 | 2.00     | 255,924   |
| Station_360 | 3   | 200 | -66.58 | 140.88 | 2.00     | 178,368   |

---

|             |     |     |        |        |          |         |
|-------------|-----|-----|--------|--------|----------|---------|
| Station_355 | 0.1 | 0.8 | -66.76 | 144.33 | 2.00     | 473,774 |
| Station_355 | 0.8 | 3   | -66.76 | 144.33 | 2.00     | 456,349 |
| Station_355 | 3   | 200 | -66.76 | 144.33 | 2.00     | 338,571 |
| Station_356 | 0.1 | 0.8 | -66.76 | 144.33 | 890.00   | 494,195 |
| Station_356 | 0.8 | 3   | -66.76 | 144.33 | 890.00   | 402,615 |
| Station_356 | 3   | 200 | -66.76 | 144.33 | 890.00   | 448,121 |
| Station_352 | 0.1 | 0.8 | -66.77 | 143.29 | 2.50     | 556,684 |
| Station_352 | 0.8 | 3   | -66.77 | 143.29 | 2.50     | 467,204 |
| Station_352 | 3   | 200 | -66.77 | 143.29 | 2.50     | 387,214 |
| Station_353 | 0.1 | 0.8 | -67.05 | 144.67 | 2.00     | 533,045 |
| Station_353 | 0.8 | 3   | -67.05 | 144.67 | 2.00     | 246,833 |
| Station_353 | 3   | 200 | -67.05 | 144.67 | 2.00     | 270,886 |
| Station_354 | 0.1 | 0.8 | -67.07 | 145.20 | 1,320.00 | 601,668 |
| Station_354 | 0.8 | 3   | -67.07 | 145.20 | 1,320.00 | 462,720 |
| Station_354 | 3   | 200 | -67.07 | 145.20 | 1,320.00 | 395,663 |
| Station_391 | 0.1 | 0.8 | -68.40 | 76.68  | 1.00     | 397,515 |
| Station_391 | 0.8 | 3   | -68.40 | 76.68  | 1.00     | 194,952 |
| Station_391 | 3   | 200 | -68.40 | 76.68  | 1.00     | 2       |
| Site227     | 0.1 | 0.8 | -68.40 | 78.18  | 23.00    | 516,553 |
| Site227     | 0.8 | 3   | -68.40 | 78.18  | 23.00    | 597,573 |
| Site227     | 3   | 200 | -68.40 | 78.18  | 23.00    | 281,508 |
| Site228     | 0.1 | 0.8 | -68.40 | 78.18  | 18.00    | 377,213 |
| Site228     | 0.8 | 3   | -68.40 | 78.18  | 18.00    | 576,338 |
| Site228     | 3   | 200 | -68.40 | 78.18  | 18.00    | 297,908 |
| Site229     | 0.1 | 0.8 | -68.40 | 78.18  | 14.00    | 431,973 |
| Site229     | 0.8 | 3   | -68.40 | 78.18  | 14.00    | 477,621 |
| Site229     | 3   | 200 | -68.40 | 78.18  | 14.00    | 313,907 |
| Site230     | 0.1 | 0.8 | -68.40 | 78.18  | 12.70    | 457,150 |
| Site230     | 0.8 | 3   | -68.40 | 78.18  | 12.70    | 559,951 |
| Site230     | 3   | 200 | -68.40 | 78.18  | 12.70    | 220,480 |
| Site231     | 0.1 | 0.8 | -68.40 | 78.18  | 11.50    | 561,283 |
| Site231     | 0.8 | 3   | -68.40 | 78.18  | 11.50    | 508,260 |
| Site231     | 3   | 200 | -68.40 | 78.18  | 11.50    | 384,538 |
| Site232     | 0.1 | 0.8 | -68.40 | 78.18  | 5.00     | 575,374 |
| Site232     | 0.8 | 3   | -68.40 | 78.18  | 5.00     | 496,417 |
| Site232     | 3   | 200 | -68.40 | 78.18  | 5.00     | 166,811 |
| Station_379 | 0.1 | 0.8 | -68.46 | 78.21  | 1.00     | 458,509 |
| Station_379 | 0.8 | 3   | -68.46 | 78.21  | 1.00     | 474,948 |
| Station_379 | 3   | 200 | -68.46 | 78.21  | 1.00     | 256,680 |
| Station_233 | 0.1 | 0.8 | -68.46 | 78.20  | 0.00     | 411,766 |
| Station_233 | 0.8 | 3   | -68.46 | 78.20  | 0.00     | 470,453 |
| Station_233 | 3   | 200 | -68.46 | 78.20  | 0.00     | 496,829 |
| Station_374 | 0.1 | 0.8 | -68.46 | 78.20  | 1.80     | 517,512 |
| Station_374 | 0.8 | 3   | -68.46 | 78.20  | 1.80     | 491,795 |
| Station_374 | 3   | 200 | -68.46 | 78.20  | 1.80     | 323,274 |
| Station_375 | 0.1 | 0.8 | -68.46 | 78.20  | 4.30     | 563,211 |
| Station_375 | 0.8 | 3   | -68.46 | 78.20  | 4.30     | 489,468 |
| Station_375 | 3   | 200 | -68.46 | 78.20  | 4.30     | 158,918 |
| Station_376 | 0.1 | 0.8 | -68.46 | 78.20  | 5.60     | 376,866 |
| Station_376 | 0.8 | 3   | -68.46 | 78.20  | 5.60     | 506,884 |
| Station_376 | 3   | 200 | -68.46 | 78.20  | 5.60     | 295,559 |
| Station_377 | 0.1 | 0.8 | -68.46 | 78.20  | 6.50     | 531,265 |
| Station_377 | 0.8 | 3   | -68.46 | 78.20  | 6.50     | 498,427 |
| Station_377 | 3   | 200 | -68.46 | 78.20  | 6.50     | 196,239 |
| Station_378 | 0.1 | 0.8 | -68.46 | 78.20  | 6.80     | 547,538 |
| Station_378 | 0.8 | 3   | -68.46 | 78.20  | 6.80     | 585,018 |

---

|                   |       |      |        |         |       |           |
|-------------------|-------|------|--------|---------|-------|-----------|
| Station_378       | 3     | 200  | -68.46 | 78.20   | 6.80  | 208,895   |
| Station_369       | 0.1   | 0.8  | -77.68 | 166.01  | 2.70  | 316,473   |
| Station_369       | 0.8   | 3    | -77.68 | 166.01  | 2.70  | 323,286   |
| Station_369       | 3     | 200  | -77.68 | 166.01  | 2.70  | 428,944   |
| Station_372       | 0.1   | 0.8  | -77.68 | 166.00  | NA    | 204,104   |
| Station_372       | 0.8   | 3    | -77.68 | 166.00  | NA    | 275,194   |
| Station_372       | 3     | 200  | -77.68 | 166.00  | NA    | 321,696   |
| Station_370       | 0.1   | 0.8  | -77.71 | 166.08  | 1.00  | 558,917   |
| Station_370       | 0.8   | 3    | -77.71 | 166.08  | 1.00  | 155,507   |
| Station_370       | 3     | 200  | -77.71 | 166.08  | 1.00  | 197,431   |
| Station_371       | 0.1   | 0.8  | -77.71 | 166.08  | NA    | 294,025   |
| Station_371       | 0.8   | 3    | -77.71 | 166.08  | NA    | 280,902   |
| Station_371       | 3     | 200  | -77.71 | 166.08  | NA    | 210,735   |
| GS264             | 3     | 200  | 35.09  | -120.78 | 2.00  | 139,065   |
| GS264             | 0.1   | 0.8  | 35.09  | -120.78 | 2.00  | 227,280   |
| GS264             | 0.8   | 3    | 35.09  | -120.78 | 2.00  | 126,369   |
| GS263             | 0.1   | 0.8  | 34.72  | -121.55 | 2.00  | 193,836   |
| GS263             | 0.8   | 3    | 34.72  | -121.55 | 2.00  | 154,698   |
| GS263             | 3     | 200  | 34.72  | -121.55 | 2.00  | 145,591   |
| GS257             | 3     | 200  | 33.66  | -118.97 | 2.00  | 168,177   |
| GS257             | 0.8   | 3    | 33.66  | -118.97 | 2.00  | 210,057   |
| GS262             | 0.1   | 0.8  | 33.15  | -123.22 | 2.00  | 127,780   |
| GS262             | 0.8   | 3    | 33.15  | -123.22 | 2.00  | 193,116   |
| GS262             | 3     | 200  | 33.15  | -123.22 | 2.00  | 174,478   |
| GS260             | 3     | 200  | 32.91  | -122.14 | 2.00  | 276,363   |
| GS260             | 0.8   | 3    | 32.91  | -122.14 | 2.00  | 296,068   |
| GS258             | 0.1   | 0.8  | 32.33  | -121.71 | 2.00  | 227,565   |
| GS258             | 0.8   | 3    | 32.33  | -121.71 | 2.00  | 207,779   |
| GS258             | 3     | 200  | 32.33  | -121.71 | 2.00  | 166,429   |
| GS259             | 3     | 200  | 31.91  | -124.17 | 2.00  | 179,854   |
| GS259             | 0.1   | 0.8  | 31.91  | -124.17 | 2.00  | 220,947   |
| GS259             | 0.8   | 3    | 31.91  | -124.17 | 2.00  | 152,387   |
| Mediterranean_DCM | 0.22  | 0.8  | 38.07  | -0.23   | 50.00 | 1,072,794 |
| GOM04             | 0.1   | 0.8  | 44.12  | -67.97  | 1.50  | 938,897   |
| GOM13             | 0.1   | 0.8  | 43.38  | -67.68  | 1.50  | 925,178   |
| GOM03             | 0.1   | 0.8  | 42.77  | -68.67  | 1.50  | 453,620   |
| GOM14             | 0.1   | 0.8  | 42.35  | -69.38  | 1.50  | 9,728     |
| GOM06             | 0.1   | 0.8  | 41.47  | -69.10  | 1.50  | 10,037    |
| GOM12             | 0.1   | 0.8  | 41.13  | -66.88  | 1.50  | 470,464   |
| GS006             | 0.1   | 0.8  | 45.11  | -64.95  | 1.00  | 59,660    |
| GS005             | 0.1   | 0.8  | 44.69  | -63.64  | 1.00  | 61,028    |
| GS004             | 0.1   | 0.8  | 44.14  | -63.64  | 2.00  | 52,934    |
| GS007             | 0.1   | 0.8  | 43.63  | -66.85  | 1.00  | 50,947    |
| GS003             | 0.1   | 0.8  | 42.85  | -66.22  | 1.00  | 61,578    |
| GS002             | 0.1   | 0.8  | 42.50  | -67.24  | 1.00  | 121,481   |
| GS008             | 0.1   | 0.8  | 41.49  | -71.35  | 1.00  | 129,582   |
| GS009             | 0.1   | 0.8  | 41.09  | -71.60  | 1.00  | 79,205    |
| GS011             | 0.1   | 0.8  | 39.42  | -75.50  | 1.00  | 124,342   |
| GS012             | 0.1   | 0.8  | 38.95  | -76.42  | 13.20 | 126,035   |
| GS010             | 0.1   | 0.8  | 38.94  | -74.69  | 1.00  | 78,253    |
| MOVE858           | 0.002 | 0.22 | 38.13  | -76.38  | 2.07  | 11,493    |
| GS013             | 0.1   | 0.8  | 36.00  | -75.39  | 2.10  | 137,735   |
| GS014             | 0.1   | 0.8  | 32.51  | -79.26  | 1.00  | 128,823   |
| GS000c            | 0.22  | 0.8  | 32.17  | -64.01  | 5.00  | 367,572   |
| GS001a            | 3     | 20   | 32.17  | -64.50  | 5.00  | 135,457   |
| GS001b            | 0.8   | 3    | 32.17  | -64.50  | 5.00  | 90,014    |

|        |      |     |        |         |       |           |
|--------|------|-----|--------|---------|-------|-----------|
| GS001c | 0.1  | 0.8 | 32.17  | -64.50  | 5.00  | 92,259    |
| GS000a | 0.1  | 0.8 | 31.18  | -64.32  | 5.00  | 642,806   |
| GS000b | 0.22 | 0.8 | 31.18  | -64.32  | 5.00  | 315,716   |
| GS000d | 0.22 | 0.8 | 31.18  | -64.32  | 5.00  | 330,486   |
| GS015  | 0.1  | 0.8 | 24.49  | -83.07  | 1.70  | 127,291   |
| GS016  | 0.1  | 0.8 | 24.17  | -84.34  | 2.00  | 126,919   |
| GS017  | 0.1  | 0.8 | 20.52  | -85.41  | 2.00  | 257,415   |
| GS018  | 0.1  | 0.8 | 18.04  | -83.78  | 1.70  | 142,685   |
| GS019  | 0.1  | 0.8 | 10.72  | -80.25  | 1.70  | 135,238   |
| GS020  | 0.1  | 0.8 | 9.16   | -79.84  | 2.00  | 296,264   |
| GS021  | 0.1  | 0.8 | 8.13   | -79.69  | 1.60  | 131,748   |
| GS022  | 0.1  | 0.8 | 6.49   | -82.90  | 2.00  | 121,621   |
| GS023  | 0.1  | 0.8 | 5.64   | -86.57  | 2.00  | 133,010   |
| GS025  | 0.8  | 3   | 5.55   | -87.09  | 1.10  | 120,309   |
| GS035  | 0.1  | 0.8 | 1.39   | -91.82  | 1.70  | 140,746   |
| GS026  | 0.1  | 0.8 | 1.26   | -90.30  | 2.00  | 102,669   |
| GS030  | 0.1  | 0.8 | 0.27   | -91.63  | 19.00 | 359,013   |
| GS036  | 0.1  | 0.8 | -0.02  | -91.20  | 2.10  | 77,506    |
| GS029  | 0.1  | 0.8 | -0.20  | -90.84  | 2.10  | 131,468   |
| GS031  | 0.1  | 0.8 | -0.30  | -91.65  | 12.00 | 436,224   |
| GS034  | 0.1  | 0.8 | -0.38  | -90.28  | 2.10  | 134,315   |
| GS032  | 0.1  | 0.8 | -0.59  | -91.07  | 0.10  | 147,468   |
| GS027  | 0.1  | 0.8 | -1.22  | -90.42  | 2.20  | 221,993   |
| GS028  | 0.1  | 0.8 | -1.22  | -90.32  | 2.00  | 188,997   |
| GS033  | 0.1  | 0.8 | -1.23  | -90.43  | 0.20  | 691,906   |
| GS037  | 0.1  | 0.8 | -1.97  | -95.01  | 1.80  | 65,641    |
| GS038  | 0.1  | 0.8 | -2.58  | -97.85  | 1.80  | 741       |
| GS039  | 0.1  | 0.8 | -3.34  | -101.37 | 2.00  | 759       |
| GS040  | 0.1  | 0.8 | -4.50  | -105.07 | 2.20  | 736       |
| GS117a | 0.1  | 0.8 | -4.61  | 55.51   | 1.80  | 346,836   |
| GS117b | 0.8  | 3   | -4.61  | 55.51   | 1.80  | 50,561    |
| GS116  | 0.1  | 0.8 | -4.64  | 56.84   | 1.50  | 60,917    |
| GS115  | 0.1  | 0.8 | -4.66  | 60.52   | 1.50  | 60,986    |
| GS114  | 0.1  | 0.8 | -4.99  | 64.98   | 1.50  | 348,692   |
| GS041  | 0.1  | 0.8 | -5.93  | -108.69 | 2.00  | 678       |
| GS149  | 0.1  | 0.8 | -6.12  | 39.12   | 1.50  | 110,959   |
| GS148  | 0.1  | 0.8 | -6.32  | 39.01   | 0.30  | 107,576   |
| GS113  | 0.1  | 0.8 | -7.01  | 76.33   | 1.80  | 109,641   |
| GS042  | 0.1  | 0.8 | -7.11  | -116.12 | 1.70  | 699       |
| GS043  | 0.1  | 0.8 | -7.66  | -120.40 | 1.90  | 711       |
| GS044  | 0.1  | 0.8 | -8.42  | -124.24 | 2.00  | 676       |
| GS112a | 0.1  | 0.8 | -8.51  | 80.38   | 1.80  | 99,756    |
| GS112b | 0.8  | 3   | -8.51  | 80.38   | 1.80  | 52,018    |
| GS112  | 0.1  | 0.8 | -8.51  | 80.38   | 1.80  | 1,043,098 |
| GS045  | 0.1  | 0.8 | -9.02  | -127.77 | 1.70  | 730       |
| GS046  | 0.1  | 0.8 | -9.57  | -131.49 | 1.90  | 624       |
| GS111  | 0.1  | 0.8 | -9.60  | 84.20   | 1.80  | 59,058    |
| GS047  | 0.1  | 0.8 | -10.13 | -135.45 | 30.00 | 66,004    |
| GS110a | 0.1  | 0.8 | -10.45 | 88.30   | 1.50  | 99,248    |
| GS110b | 0.8  | 3   | -10.45 | 88.30   | 1.50  | 49,517    |
| GS109  | 0.1  | 0.8 | -10.94 | 92.06   | 1.50  | 59,786    |
| GS108a | 0.1  | 0.8 | -12.09 | 96.88   | 1.80  | 51,756    |
| GS108b | 0.8  | 3   | -12.09 | 96.88   | 1.80  | 49,560    |
| GS108  | 0.1  | 0.8 | -12.09 | 96.88   | 1.80  | 1,296,088 |
| GS051  | 0.1  | 0.8 | -15.14 | -147.44 | 1.00  | 128,958   |
| GS050  | 0.1  | 0.8 | -15.28 | -148.22 | 1.20  | 713       |

|        |     |     |        |         |       |         |
|--------|-----|-----|--------|---------|-------|---------|
| GS049  | 0.1 | 0.8 | -17.45 | -149.80 | 1.40  | 92,438  |
| GS048a | 0.1 | 0.8 | -17.48 | -149.81 | 1.40  | 90,456  |
| GS048b | 0.8 | 3   | -17.48 | -149.81 | 1.40  | 47,639  |
| GS119  | 0.1 | 0.8 | -23.22 | 52.31   | 2.00  | 60,961  |
| GS120  | 0.1 | 0.8 | -26.04 | 50.12   | 2.80  | 45,992  |
| GS121  | 0.1 | 0.8 | -29.35 | 43.22   | 1.50  | 110,699 |
| GS122a | 0.1 | 0.8 | -30.90 | 40.42   | 1.90  | 101,506 |
| GS122b | 0.8 | 3   | -30.90 | 40.42   | 1.90  | 49,973  |
| GS123  | 0.1 | 0.8 | -32.40 | 36.59   | 2.20  | 107,920 |
| GS667  | 0.1 | 0.8 | 68.36  | 18.82   | 1.00  | 213,819 |
| GS667  | 0.8 | 3   | 68.36  | 18.82   | 1.00  | 166,458 |
| GS667  | 3   | 200 | 68.36  | 18.82   | 1.00  | 213,130 |
| GS665  | 0.1 | 0.8 | 65.17  | 23.23   | 1.00  | 315,270 |
| GS665  | 0.8 | 3   | 65.17  | 23.23   | 1.00  | 236,358 |
| GS665  | 3   | 200 | 65.17  | 23.23   | 1.00  | 221,727 |
| GS666  | 0.1 | 0.8 | 65.17  | 23.23   | 10.00 | 207,420 |
| GS666  | 0.8 | 3   | 65.17  | 23.23   | 10.00 | 412,840 |
| GS666  | 3   | 200 | 65.17  | 23.23   | 10.00 | 415,837 |
| GS673  | 0.1 | 0.8 | 63.50  | 19.81   | 1.00  | 468,586 |
| GS673  | 0.8 | 3   | 63.50  | 19.81   | 1.00  | 619,209 |
| GS673  | 3   | 200 | 63.50  | 19.81   | 1.00  | 138,350 |
| GS674  | 0.1 | 0.8 | 63.50  | 19.81   | 16.00 | 261,402 |
| GS674  | 0.8 | 3   | 63.50  | 19.81   | 16.00 | 214,022 |
| GS674  | 3   | 200 | 63.50  | 19.81   | 16.00 | 223,350 |
| GS659  | 0.1 | 0.8 | 62.65  | 18.95   | 1.00  | 298,393 |
| GS659  | 0.8 | 3   | 62.65  | 18.95   | 1.00  | 624,016 |
| GS659  | 3   | 200 | 62.65  | 18.95   | 1.00  | 536,378 |
| GS660  | 0.1 | 0.8 | 62.65  | 18.95   | 12.00 | 512,331 |
| GS660  | 0.8 | 3   | 62.65  | 18.95   | 12.00 | 462,008 |
| GS660  | 3   | 200 | 62.65  | 18.95   | 12.00 | 262,144 |
| GS677  | 0.1 | 0.8 | 58.58  | 18.23   | 9.00  | 279,205 |
| GS677  | 0.8 | 3   | 58.58  | 18.23   | 9.00  | 366,024 |
| GS677  | 3   | 200 | 58.58  | 18.23   | 9.00  | 363,345 |
| GS678  | 0.1 | 0.8 | 58.58  | 18.23   | 74.00 | 314,794 |
| GS678  | 0.8 | 3   | 58.58  | 18.23   | 74.00 | 499,410 |
| GS678  | 3   | 200 | 58.58  | 18.23   | 74.00 | 448,400 |
| GS687  | 0.1 | 0.8 | 58.32  | 11.54   | 1.00  | 280,654 |
| GS687  | 0.8 | 3   | 58.32  | 11.54   | 1.00  | 266,481 |
| GS687  | 3   | 200 | 58.32  | 11.54   | 1.00  | 175,602 |
| GS688  | 0.1 | 0.8 | 58.32  | 11.54   | 30.00 | 275,823 |
| GS688  | 0.8 | 3   | 58.32  | 11.54   | 30.00 | 259,768 |
| GS688  | 3   | 200 | 58.32  | 11.54   | 30.00 | 440,911 |
| GS689  | 0.1 | 0.8 | 58.32  | 11.54   | 72.00 | 278,925 |
| GS689  | 0.8 | 3   | 58.32  | 11.54   | 72.00 | 287,725 |
| GS689  | 3   | 200 | 58.32  | 11.54   | 72.00 | 186,404 |
| GS694  | 0.1 | 0.8 | 57.80  | 10.87   | 1.00  | 157,019 |
| GS694  | 0.8 | 3   | 57.80  | 10.87   | 1.00  | 196,555 |
| GS694  | 3   | 200 | 57.80  | 10.87   | 1.00  | 198,236 |
| GS695  | 0.1 | 0.8 | 57.80  | 10.87   | 19.00 | 338,026 |
| GS695  | 0.8 | 3   | 57.80  | 10.87   | 19.00 | 329,091 |
| GS695  | 3   | 200 | 57.80  | 10.87   | 19.00 | 294,173 |
| GS685  | 0.1 | 0.8 | 56.66  | 12.12   | 1.00  | 316,197 |
| GS685  | 0.8 | 3   | 56.66  | 12.12   | 1.00  | 711,352 |
| GS685  | 3   | 200 | 56.66  | 12.12   | 1.00  | 129,464 |
| GS686  | 0.1 | 0.8 | 56.66  | 12.12   | 20.00 | 136,894 |
| GS686  | 0.8 | 3   | 56.66  | 12.12   | 20.00 | 276,335 |



|                     |          |     |       |         |          |           |
|---------------------|----------|-----|-------|---------|----------|-----------|
| GS686               | 3        | 200 | 56.66 | 12.12   | 20.00    | 483,078   |
| GS679               | 0.1      | 0.8 | 56.17 | 16.38   | 1.00     | 214,330   |
| GS679               | 0.8      | 3   | 56.17 | 16.38   | 1.00     | 1,074,321 |
| GS679               | 3        | 200 | 56.17 | 16.38   | 1.00     | 206,659   |
| GS681               | 0.1      | 0.8 | 54.93 | 13.48   | 1.00     | 249,059   |
| GS681               | 0.8      | 3   | 54.93 | 13.48   | 1.00     | 361,349   |
| GS681               | 3        | 200 | 54.93 | 13.48   | 1.00     | 355,466   |
| GS682               | 0.1      | 0.8 | 54.93 | 13.48   | 24.00    | 390,373   |
| GS682               | 0.8      | 3   | 54.93 | 13.48   | 24.00    | 354,283   |
| GS682               | 3        | 200 | 54.93 | 13.48   | 24.00    | 365       |
| GS683               | 0.1      | 0.8 | 54.57 | 11.33   | 1.00     | 315,025   |
| GS683               | 0.8      | 3   | 54.57 | 11.33   | 1.00     | 182,830   |
| GS683               | 3        | 200 | 54.57 | 11.33   | 1.00     | 443,411   |
| GS684               | 0.1      | 0.8 | 54.57 | 11.33   | 15.00    | 211,945   |
| GS684               | 0.8      | 3   | 54.57 | 11.33   | 15.00    | 487,677   |
| GS684               | 3        | 200 | 54.57 | 11.33   | 15.00    | 165,069   |
| GS728               | 0.1      | 0.8 | 42.13 | 2.77    | 1.75     | 283,037   |
| GS728               | 0.8      | 3   | 42.13 | 2.77    | 1.75     | 275,249   |
| GS728               | 3        | 200 | 42.13 | 2.77    | 1.75     | 249,861   |
| GS729               | 0.1      | 0.8 | 42.13 | 2.77    | 4.50     | 243,126   |
| GS729               | 0.8      | 3   | 42.13 | 2.77    | 4.50     | 407,779   |
| GS729               | 3        | 200 | 42.13 | 2.77    | 4.50     | 275,434   |
| GS730               | 0.1      | 0.8 | 42.12 | 2.75    | 22.25    | 397,015   |
| GS730               | 0.8      | 3   | 42.12 | 2.75    | 22.25    | 280,423   |
| GS730               | 3        | 200 | 42.12 | 2.75    | 22.25    | 281,092   |
| GS731               | 0.1      | 0.8 | 42.12 | 2.75    | 24.00    | 283,007   |
| GS731               | 0.8      | 3   | 42.12 | 2.75    | 24.00    | 445,694   |
| GS731               | 3        | 200 | 42.12 | 2.75    | 24.00    | 237,205   |
| BATS216_20M_SG      | 0.22     | 1.6 | 31.67 | -64.17  | 20.00    | 140,565   |
| BATS216_50M_SG      | 0.22     | 1.6 | 31.67 | -64.17  | 50.00    | 132,100   |
| HF10_10-07-02       | 1/0/1900 | 1.6 | 22.75 | -158.00 | 10.00    | 6,953     |
| HF130_10-06-02      | 1/0/1900 | 1.6 | 22.75 | -158.00 | 130.00   | 4,195     |
| HF200_10-06-02      | 1/0/1900 | 1.6 | 22.75 | -158.00 | 200.00   | 6,499     |
| HF4000_12-21-03     | 1/0/1900 | 1.6 | 22.75 | -158.00 | 4,000.00 | 10,228    |
| HF500_10-06-02      | 1/0/1900 | 1.6 | 22.75 | -158.00 | 500.00   | 8,169     |
| HF70_10-07-02       | 1/0/1900 | 1.6 | 22.75 | -158.00 | 70.00    | 10,120    |
| HF770_12-21-03      | 1/0/1900 | 1.6 | 22.75 | -158.00 | 770.00   | 11,107    |
| HOT179_125M_GDNA    | NA       | NA  | 22.75 | -158.00 | 125.00   | 248,409   |
| HOT179_25M_GDNA     | NA       | NA  | 22.75 | -158.00 | 25.00    | 271,426   |
| HOT179_500M_GDNA    | NA       | NA  | 22.75 | -158.00 | 500.00   | 264,793   |
| HOT179_75M_GDNA     | NA       | NA  | 22.75 | -158.00 | 75.00    | 306,043   |
| HOT179_125M_SG      | 0.22     | 1.6 | 22.73 | -158.03 | 125.00   | 151,719   |
| HOT179_25M_SG       | 0.22     | 1.6 | 22.73 | -158.03 | 25.00    | 129,094   |
| HOT179_500M_SG      | 0.22     | 1.6 | 22.73 | -158.03 | 500.00   | 132,282   |
| HOT179_75M_SG       | 0.22     | 1.6 | 22.73 | -158.03 | 75.00    | 148,059   |
| HOT186_110M_GDNA    | 0.22     | 1.6 | 22.73 | -158.03 | 110.00   | 425,140   |
| HOT186_25M_GDNA     | 0.22     | 1.6 | 22.73 | -158.03 | 25.00    | 535,032   |
| HOT186_500M_GDNA    | 0.22     | 1.6 | 22.73 | -158.03 | 500.00   | 895,630   |
| HOT186_75M_GDNA     | 0.22     | 1.6 | 22.73 | -158.03 | 75.00    | 587,968   |
| Kueishantao_Surface | 0.22     | 0.8 | 24.83 | 121.95  | 0.00     | 297,277   |
| Kueishantao_Vent    | 0.22     | 0.8 | 24.83 | 121.95  | 17.20    | 260,302   |
| S_35179             | 0.2      | 5   | 13.48 | -159.88 | 5.00     | 199,041   |
| S_35171             | 0.2      | 5   | 8.63  | -151.08 | 5.00     | 54,660    |

|                   |      |     |        |         |              |         |
|-------------------|------|-----|--------|---------|--------------|---------|
| S_35162           | 5    | 5   | 5.08   | -161.97 | 5.00         | 49,617  |
| S_35163           | 0.2  | 5   | 5.08   | -161.97 | 5.00         | 238,303 |
| S_35155           | 0.2  | 5   | 1.67   | -163.67 | 5.00         | 243,049 |
| S_35147           | 0.2  | 5   | -3.03  | -166.00 | 5.00         | 82,924  |
| S_35139           | 0.2  | 5   | -7.52  | -167.00 | 5.00         | 64,729  |
| S_35131           | 0.2  | 5   | -16.00 | -170.00 | 5.00         | 179,347 |
| MB2000JD298_1     | 0.2  | NA  | 36.75  | -122.02 | 0.00         | 197,581 |
| MB2000JD298_2     | 0.2  | NA  | 36.75  | -122.02 | 0.00         | 182,512 |
| MB2001JD115_1     | 0.2  | NA  | 36.75  | -122.02 | 0.00         | 169,978 |
| MB2001JD115_2     | 0.2  | NA  | 36.75  | -122.02 | 0.00         | 159,644 |
| MB2001JD135_1     | 0.2  | NA  | 36.75  | -122.02 | 0.00         | 200,520 |
| MB2001JD135_2     | 0.2  | NA  | 36.75  | -122.02 | 0.00         | 163,286 |
| BATS-174-1        | NA   | NA  | 31.71  | -64.21  | 120.00       | 217,918 |
| BATS-174-2        | NA   | NA  | 31.71  | -64.21  | NA           | 234,036 |
| BATS-173-120      | 0.2  | NA  | 31.68  | -64.17  | 40.00        | 469,168 |
| BATS-173-40       | 0.2  | NA  | 31.68  | -64.17  | NA           | 485,710 |
| BATS-174a-80      | 0.2  | NA  | 31.66  | -64.12  | 80.00        | 457,334 |
| BATS-179-1        | NA   | NA  | 31.66  | -64.16  | NA           | 178,547 |
| BATS-179-2        | NA   | NA  | 31.66  | -64.16  | NA           | 207,731 |
| BATS-167-0        | 0.2  | NA  | 31.65  | -64.26  | 1.00         | 531,905 |
| BATS-167-120      | 0.2  | NA  | 31.65  | -64.26  | 120.00       | 421,731 |
| BATS-167-160      | 0.2  | NA  | 31.65  | -64.26  | 160.00       | 287,951 |
| BATS-167-200      | 0.2  | NA  | 31.65  | -64.26  | 200.00       | 568,776 |
| BATS-167-250      | 0.2  | NA  | 31.65  | -64.26  | 250.00       | 484,444 |
| BATS-167-40       | 0.2  | NA  | 31.65  | -64.26  | 40.00        | 457,926 |
| BATS-167-80       | 0.2  | NA  | 31.65  | -64.26  | 80.00        | 493,797 |
| st23_D            | 0.1  | 0.8 | 42.17  | 17.72   | DCMNA(56 m)  | 223,698 |
| st23_S            | 0.1  | 0.8 | 42.17  | 17.72   | SRF          | 182,856 |
| st7_D             | 0.1  | 0.8 | 37.04  | -1.95   | DCMNA(42 m)  | 856,705 |
| st7_S             | 0.1  | 0.8 | 37.04  | -1.95   | SRF          | 307,202 |
| st3_S             | 0.1  | 0.8 | 36.73  | -10.47  | SRF          | 59,195  |
| st4_S             | 0.1  | 0.8 | 36.55  | -6.57   | SRF          | 132,612 |
| st6_S             | 0.1  | 0.8 | 36.52  | -4.01   | SRF          | 89,804  |
| st30_S            | 0.1  | 0.8 | 33.92  | 32.89   | SRF          | 244,969 |
| st31_S            | 0.1  | 0.8 | 27.14  | 34.81   | SRF          | 587,699 |
| st36_S            | 0.1  | 0.8 | 20.82  | 63.51   | SRF          | 687,836 |
| st38_S            | 0.1  | 0.8 | 19.04  | 64.49   | SRF          | 573,463 |
| st38_Z            | 0.1  | 0.8 | 19.04  | 64.56   | OMZNA(350 m) | 602,254 |
| st39_Z            | 0.1  | 0.8 | 18.73  | 66.39   | OMZNA(270 m) | 640,380 |
| st39_S            | 0.1  | 0.8 | 18.57  | 66.49   | SRF          | 561,923 |
| st43_S            | 0.1  | 0.8 | 4.66   | 73.49   | SRF          | 504,252 |
| st46_S            | 0.1  | 0.8 | -0.66  | 73.16   | SRF          | 616,110 |
| st49_S            | 0.1  | 0.8 | -16.81 | 59.50   | SRF          | 640,607 |
| SMPL_AUG_10AM_PF  | 0.22 | NA  | 50.27  | -4.15   | 2.00         | 294,987 |
| SMPL_AUG_4AM_PF   | 0.22 | NA  | 50.27  | -4.15   | 2.00         | 458,942 |
| SMPL_JAN_NIGHT_PF | 0.22 | NA  | 50.26  | -4.24   | 2.00         | 707,309 |
| SMPL_AUG_10PM_PF  | 0.22 | NA  | 50.25  | -4.20   | 2.00         | 479,204 |
| SMPL_AUG_4PM_PF   | 0.22 | NA  | 50.25  | -4.20   | 2.00         | 561,201 |
| SMPL_APR_NIGHT_PF | 0.22 | NA  | 50.25  | -4.19   | 2.00         | 435,993 |
| SMPL_APR_DAY      | 0.22 | NA  | 50.25  | -4.21   | 2.00         | 328,169 |

---

|                 |      |    |       |       |      |         |
|-----------------|------|----|-------|-------|------|---------|
| SMPL_APR_DAY_PF | 0.22 | NA | 50.25 | -4.21 | 2.00 | 579,226 |
| SMPL_JAN_DAY    | 0.22 | NA | 50.25 | -4.21 | 2.00 | 667,498 |
| SMPL_JAN_DAY_PF | 0.22 | NA | 50.25 | -4.21 | 2.00 | 488,877 |

---

Table S3. Count of metagenomic reads hitting to Roseobacters in general and percentage of the four largely uncultivated lineages in Roseobacters, respectively. DCM, deep chlorophyll maximum; FL, free-living; PA, particle-associated. The Tara Ocean metagenomes were obtained from Hingamp et al. 2013 (ISME J). The new Tara data (from Sunagawa et al. 2015, Science) were not available at the time of this analysis.

| PROJ                   | Living Style and Temperate Zone | # Roseobacter Reads | # CHAB-I-5 reads | %     | # DC5-80-3 reads | %     | # SAG-O19 reads | %     | # NAC11-7 reads | %     |
|------------------------|---------------------------------|---------------------|------------------|-------|------------------|-------|-----------------|-------|-----------------|-------|
| Southern Ocean         | FL_Tropical                     | 0                   | 0                | 0.00  | 0                | 0.00  | 0               | 0.00  | 0               | 0.00  |
| Southern Ocean         | FL_Temperate                    | 318,264             | 11,146           | 3.50  | 130,351          | 40.96 | 25,730          | 8.08  | 49,124          | 15.43 |
| Southern Ocean         | FL_Polar                        | 184,216             | 6,034            | 3.28  | 64,630           | 35.08 | 6,623           | 3.60  | 26,972          | 14.64 |
| Southern Ocean         | PA_Tropical                     | 0                   | 0                | 0.00  | 0                | 0.00  | 0               | 0.00  | 0               | 0.00  |
| Southern Ocean         | PA_Temperate                    | 206,254             | 8,075            | 3.92  | 90,763           | 44.01 | 11,060          | 5.36  | 22,416          | 10.87 |
| Southern Ocean         | PA_Polar                        | 275,983             | 6,627            | 2.40  | 73,086           | 26.48 | 5,154           | 1.87  | 22,787          | 8.26  |
| calcofi                | FL_Tropical                     | 0                   | 0                | 0.00  | 0                | 0.00  | 0               | 0.00  | 0               | 0.00  |
| calcofi                | FL_Temperate                    | 47,963              | 5,245            | 10.94 | 11,416           | 23.80 | 7,424           | 15.48 | 16,030          | 33.42 |
| calcofi                | FL_Polar                        | 0                   | 0                | 0.00  | 0                | 0.00  | 0               | 0.00  | 0               | 0.00  |
| calcofi                | PA_Tropical                     | 0                   | 0                | 0.00  | 0                | 0.00  | 0               | 0.00  | 0               | 0.00  |
| calcofi                | PA_Temperate                    | 28,879              | 5,668            | 19.63 | 3,594            | 12.45 | 2,464           | 8.53  | 10,506          | 36.38 |
| calcofi                | PA_Polar                        | 0                   | 0                | 0.00  | 0                | 0.00  | 0               | 0.00  | 0               | 0.00  |
| Mediterranean DCM      | FL_Tropical                     | 0                   | 0                | 0.00  | 0                | 0.00  | 0               | 0.00  | 0               | 0.00  |
| Mediterranean DCM      | FL_Temperate                    | 12,801              | 888              | 6.94  | 579              | 4.52  | 5,436           | 42.47 | 871             | 6.80  |
| Mediterranean DCM      | FL_Polar                        | 0                   | 0                | 0.00  | 0                | 0.00  | 0               | 0.00  | 0               | 0.00  |
| Mediterranean DCM      | PA_Tropical                     | 0                   | 0                | 0.00  | 0                | 0.00  | 0               | 0.00  | 0               | 0.00  |
| Mediterranean DCM      | PA_Temperate                    | 0                   | 0                | 0.00  | 0                | 0.00  | 0               | 0.00  | 0               | 0.00  |
| Mediterranean DCM      | PA_Polar                        | 0                   | 0                | 0.00  | 0                | 0.00  | 0               | 0.00  | 0               | 0.00  |
| Gulf of Maine          | FL_Tropical                     | 0                   | 0                | 0.00  | 0                | 0.00  | 0               | 0.00  | 0               | 0.00  |
| Gulf of Maine          | FL_Temperate                    | 79,525              | 17,397           | 21.88 | 16,949           | 21.31 | 12,161          | 15.29 | 10,808          | 13.59 |
| Gulf of Maine          | FL_Polar                        | 0                   | 0                | 0.00  | 0                | 0.00  | 0               | 0.00  | 0               | 0.00  |
| Gulf of Maine          | PA_Tropical                     | 0                   | 0                | 0.00  | 0                | 0.00  | 0               | 0.00  | 0               | 0.00  |
| Gulf of Maine          | PA_Temperate                    | 0                   | 0                | 0.00  | 0                | 0.00  | 0               | 0.00  | 0               | 0.00  |
| Gulf of Maine          | PA_Polar                        | 0                   | 0                | 0.00  | 0                | 0.00  | 0               | 0.00  | 0               | 0.00  |
| GOS                    | FL_Tropical                     | 238,264             | 15,599           | 6.55  | 7,068            | 2.97  | 110,268         | 46.28 | 12,327          | 5.17  |
| GOS                    | FL_Temperate                    | 61,770              | 6,922            | 11.21 | 10,099           | 16.35 | 19,519          | 32.09 | 6,304           | 10.21 |
| GOS                    | FL_Polar                        | 0                   | 0                | 0.00  | 0                | 0.00  | 0               | 0.00  | 0               | 0.00  |
| GOS                    | PA_Tropical                     | 3,331               | 360              | 10.81 | 95               | 2.85  | 957             | 28.73 | 140             | 4.20  |
| GOS                    | PA_Temperate                    | 1,798               | 956              | 53.17 | 52               | 2.89  | 150             | 8.34  | 82              | 4.56  |
| GOS                    | PA_Polar                        | 0                   | 0                | 0.00  | 0                | 0.00  | 0               | 0.00  | 0               | 0.00  |
| GOS Baltic_sea         | FL_Tropical                     | 0                   | 0                | 0.00  | 0                | 0.00  | 0               | 0.00  | 0               | 0.00  |
| GOS Baltic_sea         | FL_Temperate                    | 43,522              | 4,252            | 9.77  | 9,617            | 22.10 | 2,314           | 5.32  | 14,670          | 33.71 |
| GOS Baltic_sea         | FL_Polar                        | 282                 | 14               | 4.96  | 17               | 6.03  | 9               | 3.19  | 14              | 4.96  |
| GOS Baltic_sea         | PA_Tropical                     | 0                   | 0                | 0.00  | 0                | 0.00  | 0               | 0.00  | 0               | 0.00  |
| GOS Baltic_sea         | PA_Temperate                    | 128,515             | 24,588           | 19.13 | 27,558           | 21.44 | 3,188           | 2.48  | 12,690          | 9.87  |
| GOS Baltic_sea         | PA_Polar                        | 203                 | 9                | 4.43  | 11               | 5.42  | 10              | 4.93  | 8               | 3.94  |
| GOS banyoles           | FL_Tropical                     | 0                   | 0                | 0.00  | 0                | 0.00  | 0               | 0.00  | 0               | 0.00  |
| GOS banyoles           | FL_Temperate                    | 898                 | 31               | 3.45  | 40               | 4.45  | 168             | 18.71 | 48              | 5.35  |
| GOS banyoles           | FL_Polar                        | 0                   | 0                | 0.00  | 0                | 0.00  | 0               | 0.00  | 0               | 0.00  |
| GOS banyoles           | PA_Tropical                     | 0                   | 0                | 0.00  | 0                | 0.00  | 0               | 0.00  | 0               | 0.00  |
| GOS banyoles           | PA_Temperate                    | 699                 | 24               | 3.43  | 28               | 4.01  | 173             | 24.75 | 18              | 2.58  |
| GOS banyoles           | PA_Polar                        | 0                   | 0                | 0.00  | 0                | 0.00  | 0               | 0.00  | 0               | 0.00  |
| HOT ALOHA              | FL_Tropical                     | 25,674              | 1,890            | 7.36  | 1,368            | 5.33  | 7,557           | 29.43 | 2,201           | 8.57  |
| HOT ALOHA              | FL_Temperate                    | 3,303               | 471              | 14.26 | 175              | 5.30  | 706             | 21.37 | 396             | 11.99 |
| HOT ALOHA              | FL_Polar                        | 0                   | 0                | 0.00  | 0                | 0.00  | 0               | 0.00  | 0               | 0.00  |
| HOT ALOHA              | PA_Tropical                     | 0                   | 0                | 0.00  | 0                | 0.00  | 0               | 0.00  | 0               | 0.00  |
| HOT ALOHA              | PA_Temperate                    | 0                   | 0                | 0.00  | 0                | 0.00  | 0               | 0.00  | 0               | 0.00  |
| HOT ALOHA              | PA_Polar                        | 0                   | 0                | 0.00  | 0                | 0.00  | 0               | 0.00  | 0               | 0.00  |
| Kueishantao Island     | FL_Tropical                     | 0                   | 0                | 0.00  | 0                | 0.00  | 0               | 0.00  | 0               | 0.00  |
| Kueishantao Island     | FL_Temperate                    | 1,806               | 92               | 5.09  | 43               | 2.38  | 1,117           | 61.85 | 55              | 3.05  |
| Kueishantao Island     | FL_Polar                        | 0                   | 0                | 0.00  | 0                | 0.00  | 0               | 0.00  | 0               | 0.00  |
| Kueishantao Island     | PA_Tropical                     | 0                   | 0                | 0.00  | 0                | 0.00  | 0               | 0.00  | 0               | 0.00  |
| Kueishantao Island     | PA_Temperate                    | 0                   | 0                | 0.00  | 0                | 0.00  | 0               | 0.00  | 0               | 0.00  |
| Kueishantao Island     | PA_Polar                        | 0                   | 0                | 0.00  | 0                | 0.00  | 0               | 0.00  | 0               | 0.00  |
| Pacific Ocean transect | FL_Tropical                     | 14,932              | 801              | 5.36  | 509              | 3.41  | 8,214           | 55.01 | 671             | 4.49  |
| Pacific Ocean transect | FL_Temperate                    | 0                   | 0                | 0.00  | 0                | 0.00  | 0               | 0.00  | 0               | 0.00  |
| Pacific Ocean transect | FL_Polar                        | 0                   | 0                | 0.00  | 0                | 0.00  | 0               | 0.00  | 0               | 0.00  |
| Pacific Ocean transect | PA_Tropical                     | 0                   | 0                | 0.00  | 0                | 0.00  | 0               | 0.00  | 0               | 0.00  |
| Pacific Ocean transect | PA_Temperate                    | 0                   | 0                | 0.00  | 0                | 0.00  | 0               | 0.00  | 0               | 0.00  |
| Pacific Ocean transect | PA_Polar                        | 0                   | 0                | 0.00  | 0                | 0.00  | 0               | 0.00  | 0               | 0.00  |
| Monterey_bay           | FL_Tropical                     | 0                   | 0                | 0.00  | 0                | 0.00  | 0               | 0.00  | 0               | 0.00  |
| Monterey_bay           | FL_Temperate                    | 109,490             | 15,541           | 14.19 | 13,796           | 12.60 | 2,315           | 2.11  | 66,701          | 60.92 |
| Monterey_bay           | FL_Polar                        | 0                   | 0                | 0.00  | 0                | 0.00  | 0               | 0.00  | 0               | 0.00  |
| Monterey_bay           | PA_Tropical                     | 0                   | 0                | 0.00  | 0                | 0.00  | 0               | 0.00  | 0               | 0.00  |
| Monterey_bay           | PA_Temperate                    | 0                   | 0                | 0.00  | 0                | 0.00  | 0               | 0.00  | 0               | 0.00  |
| Monterey_bay           | PA_Polar                        | 0                   | 0                | 0.00  | 0                | 0.00  | 0               | 0.00  | 0               | 0.00  |
| north Atlantic         | FL_Tropical                     | 0                   | 0                | 0.00  | 0                | 0.00  | 0               | 0.00  | 0               | 0.00  |
| north Atlantic         | FL_Temperate                    | 24,397              | 4,538            | 18.60 | 1,131            | 4.64  | 5,035           | 20.64 | 1,579           | 6.47  |
| north Atlantic         | FL_Polar                        | 0                   | 0                | 0.00  | 0                | 0.00  | 0               | 0.00  | 0               | 0.00  |
| north Atlantic         | PA_Tropical                     | 0                   | 0                | 0.00  | 0                | 0.00  | 0               | 0.00  | 0               | 0.00  |
| north Atlantic         | PA_Temperate                    | 0                   | 0                | 0.00  | 0                | 0.00  | 0               | 0.00  | 0               | 0.00  |
| north Atlantic         | PA_Polar                        | 0                   | 0                | 0.00  | 0                | 0.00  | 0               | 0.00  | 0               | 0.00  |
| Tara                   | FL_Tropical                     | 69,375              | 5,039            | 7.26  | 2,316            | 3.34  | 32,825          | 47.32 | 2,954           | 4.26  |
| Tara                   | FL_Temperate                    | 71,894              | 9,325            | 12.97 | 2,612            | 3.63  | 30,351          | 42.22 | 5,456           | 7.59  |
| Tara                   | FL_Polar                        | 0                   | 0                | 0.00  | 0                | 0.00  | 0               | 0.00  | 0               | 0.00  |
| Tara                   | PA_Tropical                     | 0                   | 0                | 0.00  | 0                | 0.00  | 0               | 0.00  | 0               | 0.00  |
| Tara                   | PA_Temperate                    | 0                   | 0                | 0.00  | 0                | 0.00  | 0               | 0.00  | 0               | 0.00  |
| Tara                   | PA_Polar                        | 0                   | 0                | 0.00  | 0                | 0.00  | 0               | 0.00  | 0               | 0.00  |
| Western Channel        | FL_Tropical                     | 0                   | 0                | 0.00  | 0                | 0.00  | 0               | 0.00  | 0               | 0.00  |
| Western Channel        | FL_Temperate                    | 226,737             | 16,098           | 7.10  | 34,942           | 15.41 | 17,110          | 7.55  | 132,097         | 58.26 |
| Western Channel        | FL_Polar                        | 0                   | 0                | 0.00  | 0                | 0.00  | 0               | 0.00  | 0               | 0.00  |
| Western Channel        | PA_Tropical                     | 0                   | 0                | 0.00  | 0                | 0.00  | 0               | 0.00  | 0               | 0.00  |
| Western Channel        | PA_Temperate                    | 0                   | 0                | 0.00  | 0                | 0.00  | 0               | 0.00  | 0               | 0.00  |
| Western Channel        | PA_Polar                        | 0                   | 0                | 0.00  | 0                | 0.00  | 0               | 0.00  | 0               | 0.00  |

**Table S4.** Survey of select genes and metabolic pathways in pelagic *Roseobacter* representatives (Continued from Table 4).

| Functional Category            | Pathway                                                  | CHAB-I-5 | SAG-OI9 | DC5-80-3 | NAC11-7 | CCSI | HTCC2597 | HTCC2516 | Y4I | GAI101 | DSS-3 |
|--------------------------------|----------------------------------------------------------|----------|---------|----------|---------|------|----------|----------|-----|--------|-------|
| carbohydrate uptake            | <i>aglEFGK</i> , alpha-glucoside uptake                  | •        | •       | •        |         | •    |          | •        |     |        |       |
|                                | <i>rhaPSQT</i> , rhamnose uptake                         | •        |         | •        |         | •    |          | •        |     |        |       |
|                                | <i>frcABC</i> , fructose uptake                          | •        | •       | •        | •       | •    |          |          |     | •      |       |
|                                | <i>rbsABC</i> , ribose uptake                            | •        |         | •        |         | •    | •        | •        |     | •      |       |
|                                | <i>smoEFG</i> , sorbitol/mannitol uptake                 | •        | •       | •        | •       | •    | •        | •        |     | •      |       |
|                                | <i>xylFGH</i> , D-xylose uptake                          | •        | •       | •        | •       |      | •        | •        |     | •      | •     |
|                                | <i>msmEFG</i> , raffinose/stachyose/melibiose uptake     |          |         |          |         | •    |          | •        |     |        | •     |
|                                | <i>malEFG</i> , maltose/maltodextrin uptake              |          |         |          |         |      |          | •        |     |        |       |
|                                | <i>gtsABC</i> , glucose/mannose uptake                   | •        |         |          |         | •    |          | •        | •   |        |       |
|                                | <i>glpVPGST</i> , glycerol uptake                        | •        |         |          |         | •    | •        |          | •   | •      | •     |
| PTS, phosphotransferase system | •                                                        | •        | •       | •        | •       | •    | •        | •        | •   | •      |       |
| organic acid uptake            | TRAP, tripartite ATP-independent periplasmic transporter | •        | •       | •        | •       | •    | •        | •        | •   | •      | •     |
|                                | TTT, tripartite tricarboxylate transporter               | •        | •       | •        | •       | •    |          | •        | •   | •      | •     |
| N-acetyltaurine catabolism     | <i>naaTSRABC</i>                                         |          |         | •        |         |      |          |          |     | •      | •     |
| aromatics catabolism           | <i>pcaH</i> , protocatechuate 3,4-dioxygenase            |          | •       | •        |         | •    | •        |          | •   | •      |       |
|                                | <i>ferA</i> , feruloyl-CoA synthetase                    | •        | •       | •        | •       | •    | •        |          | •   | •      | •     |
| nitrogen acquisition           | <i>nasDEF</i> , nitrate/nitrite uptake                   | •        |         |          |         | •    |          |          |     | •      |       |
|                                | <i>nasA/nirB</i> , assimilatory nitrate reductase        |          |         |          |         | •    |          |          |     | •      |       |
|                                | <i>pepL</i> , leucine aminopeptidase                     | •        | •       | •        | •       | •    | •        | •        | •   | •      | •     |
|                                | <i>pepP</i> , proline aminopeptidase                     | •        | •       | •        | •       | •    | •        | •        | •   | •      | •     |
|                                | <i>pepN</i> , alanine aminopeptidase                     | •        | •       | •        | •       | •    | •        | •        | •   | •      | •     |
|                                | <i>pepM</i> , methionine aminopeptidase                  | •        | •       | •        | •       | •    | •        | •        | •   | •      | •     |
|                                | <i>amtB</i> , ammonium uptake                            | •        | •       | •        | •       | •    | •        | •        | •   | •      | •     |
|                                | <i>aapJQMP</i> , L-amino acid uptake                     | •        | •       | •        | •       | •    | •        | •        | •   | •      | •     |
|                                | <i>livGFHMK</i> , branched amino acid uptake             | •        | •       | •        | •       | •    | •        | •        | •   | •      | •     |
|                                | <i>glnA</i> , glutamine synthetase                       | •        | •       | •        | •       | •    | •        | •        | •   | •      | •     |
|                                | <i>gltBD</i> , glutamate synthase                        | •        | •       | •        | •       | •    | •        | •        | •   | •      | •     |
|                                | <i>glnBD</i> , <i>ntrBC</i> , regulatory                 | •        | •       | •        | •       | •    | •        | •        | •   | •      | •     |
|                                | <i>ntrXY</i> , regulatory                                | •        | •       | •        | •       | •    | •        | •        | •   | •      | •     |
|                                | <i>potABCD</i> , polyamine uptake                        |          | •       | •        | •       | •    | •        | •        | •   | •      | •     |
|                                | <i>potFGHI</i> , polyamine uptake                        | •        | •       |          | •       |      | •        |          | •   | •      | •     |
|                                | <i>urtABCDE</i> , urea uptake                            | •        | •       |          |         |      | •        | •        |     | •      | •     |
|                                | <i>ureABCDEFGF</i> , urease                              | •        | •       | •        |         |      | •        | •        | •   |        | •     |
| <i>occTPMQ</i> , opine uptake  |                                                          |          |         |          |         |      |          |          |     |        |       |
| phosphorus uptake              | <i>pstABCS</i> , phosphate uptake                        | •        | •       | •        |         | •    | •        | •        | •   | •      | •     |
|                                | <i>phoX</i> , alkaline phosphatase                       | •        |         |          |         | •    |          |          | •   | •      | •     |
|                                | <i>phoA</i> , alkaline phosphatase                       |          |         |          |         |      |          |          |     |        |       |
|                                | <i>phoD</i> , alkaline phosphatase                       |          |         |          |         |      |          |          | •   | •      | •     |
|                                | <i>phnGHIJM</i> , C-P lyase                              |          |         |          |         |      | •        |          | •   | •      | •     |
| iron uptake                    | <i>afuAB</i> , iron (III) uptake                         | •        |         |          |         |      |          | •        |     |        |       |
|                                | <i>feoB</i> , iron (II) uptake                           | •        |         |          |         |      |          |          |     |        |       |
|                                | <i>fecA</i> , iron (III) dicitrate uptake                |          |         |          |         |      |          |          |     | •      |       |
|                                | <i>ftr1</i> , iron permease                              |          |         |          |         |      |          |          |     | •      | •     |
|                                | heme uptake                                              |          |         |          |         |      |          |          |     |        |       |
|                                | siderophore synthesis                                    |          |         |          |         |      |          |          |     |        |       |
|                                | siderophore uptake                                       |          |         |          |         |      | •        | •        | •   | •      |       |
| vitamin synthesis              | B <sub>12</sub> , cobalamin                              | •        | •       | •        | •       | •    | •        | •        | •   | •      | •     |
|                                | B <sub>6</sub> , pyridoxine                              | •        | •       | •        | •       | •    | •        | •        | •   | •      | •     |
|                                | B <sub>1</sub> , thiamine                                |          |         |          |         |      | •        |          | •   |        | •     |
|                                | B <sub>7</sub> , biotin                                  |          |         |          |         |      |          |          | •   |        | •     |
